# Supplementary material for: Role of Ga3+ promoter in the direct synthesis of iso-butanol via syngas over a K–ZnO/ZnCr2O4 catalyst
Source: Royal Society of Chemistry journal article supplement (doi:10.1039/d0cy01688h), 2020-11-27
Supplement: d0cy01688h1.pdf [file d0cy01688h1.pdf]

Supporting Information

**Roles of Ga<sup>3+</sup> promoter for direct synthesis of iso-butanol via syngas  
over K-ZnO/ZnCr<sub>2</sub>O<sub>4</sub> catalyst**

Tao Zhang<sup>a</sup>, Chunyang Zeng<sup>b</sup>, Yingquan Wu<sup>a</sup>, Nana Gong<sup>a,c</sup>, Jiaqian  
Yang<sup>a,c</sup>, Guohui Yang<sup>a</sup>, Noritatsu Tsubaki<sup>d\*</sup>, Yisheng Tan<sup>a\*</sup>

<sup>a</sup> State Key Laboratory of Coal Conversion, Institute of Coal Chemistry, Chinese Academy of Science, Taiyuan, Shanxi 030001, China

<sup>b</sup> China Petroleum Chemical Industry Federation, Beijing 100723, China

<sup>c</sup> University of Chinese Academy of Science, Beijing 100049, China

<sup>d</sup> Department of Applied Chemistry, School of Engineering, University of Toyama, Gofuku 3190, Toyama, 930-8555, Japan

## 1. Computational methods

The periodic DFT calculation was performed by using Vienna ab initio simulation Package (VASP) <sup>1-4</sup>. The generalized gradient approximation with the Perdew-Burke-Ernzerh functional was used to deal with the electron exchange-correlation energy. The projector-augmented wave method was used to describe the interactions between electrons and atomic cores, the cutoff energy for the plane-wave basis set was 450 eV. Van der Waals interaction was taken into consideration by DFT-D3 method. The geometry optimizations was performed by conjugate gradient algorithm (IBRION=2) and quasi-Newton algorithm (IBRION=1) with the convergence criterion for energy and force were less than 10<sup>-5</sup> eV and 0.02 eV/Å, respectively. A 1×1×1 k-point grid method was applied to sample the Brillouin zone. The transition state seeking for the elementary reactions of CO activation was studied by climbing image nudged elastic band (CI-NEB) method<sup>5</sup>. The obtained saddle point was confirmed by frequency analysis to have a single imaginary

frequency. All the surface atoms were fixed except for the relaxation of the adsorbed molecule or groups such as CO, C, H, CHO during CI-NEB calculations based on our computational resources.

The adsorption energies of related adsorbed species such as CO, CHO, H<sub>2</sub>O and CO<sub>2</sub> were computed by the formula:  $E_{\text{ads}} = E_{\text{x/slab}} - (E_{\text{x}} + E_{\text{slab}})$ , where  $E_{\text{x/slab}}$ ,  $E_{\text{slab}}$  and  $E_{\text{x}}$  are the total energies of species adsorbed on the slab, the slab and the isolated gas species, respectively. The reaction energy  $\Delta E$  and activation energy  $E_{\text{a}}$  are evaluated through the following equation (2) and (3):

$$\Delta H = E_{\text{fs}} - E_{\text{is}} \quad (2)$$

$$E_{\text{a}} = E_{\text{ts}} - E_{\text{is}} \quad (3)$$

where  $E_{\text{fs}}$ ,  $E_{\text{is}}$  and  $E_{\text{ts}}$  are the energies of products, reactants and transition state, respectively.

## 2. Models

### 2.1 The possible locations of Ga<sup>3+</sup> in ZnCr<sub>2</sub>O<sub>4</sub>

The possible locations of Ga<sup>3+</sup> in the doped K-ZnO/ZnCr<sub>2</sub>O<sub>4</sub> catalyst were confirmed by DFT calculation. The following possible locations of Ga<sup>3+</sup> were fall in our consideration, that is (1) Zn<sup>2+</sup> located at ZnO was replaced by Ga<sup>3+</sup>, demoted as Zn<sub>1/2</sub>Ga<sub>1/2</sub>O, (ZGO); (2) Zn<sup>2+</sup> located at the tetrahedron site of ZnCr<sub>2</sub>O<sub>4</sub> was replaced by Ga<sup>3+</sup>, denoted as ZnCr<sub>16/7</sub>Ga<sub>1/7</sub>O<sub>34/7</sub>, (ZG); (3) Cr<sup>3+</sup> located at the octahedral site of ZnCr<sub>2</sub>O<sub>4</sub> was replaced by Ga<sup>3+</sup>, denoted as ZnCr<sub>15/8</sub>Ga<sub>1/8</sub>O<sub>4</sub>, (CG); (4) Ga<sup>3+</sup> located at the vacancies in the bulk of ZnCr<sub>2</sub>O<sub>4</sub>. In addition, the possibility of ZGO, ZG, CG, and ZnGa<sub>2</sub>O<sub>4</sub> formation through ZnO,  $\gamma$ -Ga<sub>2</sub>O<sub>3</sub>, Cr<sub>2</sub>O<sub>3</sub>, and ZnCr<sub>2</sub>O<sub>4</sub> were also calculated to explore the possible origins of ZnGa<sub>2</sub>O<sub>4</sub>, or Ga adopted ZnCr spinel. The detailed reactions that fall our consideration are listed in Table s1.

The binding energy  $E_{\text{B}}$  is calculated by the following expression to test the phase stability of Ga adopted ZnCr oxide: a larger  $E_{\text{B}}$  indicates that the structure is most likely to exist and be stable, that is :

$$E_{\text{B}} = \sum E_{\text{atom}} n_{\text{atom}} - E_{\text{t}}$$

where  $E_t$  is the total energy of the constructed crystal lattice,  $E_{\text{atom}}$  is the total energy of isolated atom (Zn, Cr, Ga, and O, respectively) in vacuum,  $n_{\text{atom}}$  is the number of the atom that composed the crystal<sup>6, 7</sup>. The formation energies were calculated based on the most stable oxides phases as references states according to David A. Andersson et al 's strategy<sup>8</sup>.

## 2.2 Adsorption of Ga on(311), (310), and (202) surfaces of $\text{ZnCr}_2\text{O}_4$

The (311), (310) and (202) surfaces of  $\text{ZnCr}_2\text{O}_4$  were obtained by cutting the respective surfaces of the optimized  $\text{ZnCr}_2\text{O}_4$  spinel. Among all these surfaces, tri-coordinated oxygen atoms were chosen as the preferred adsorption sites, other coordination unsaturated atoms such as Zn and Cr on the surface are fall out of our investigation owing to the fact that the electronegativity of these two atoms are much smaller than atom O. K-point grid method for the three surfaces are  $3 \times 4 \times 1$  for (311) surface,  $3 \times 2 \times 1$  for (310) surface and  $2 \times 2 \times 1$  for (202) surface respectively, which was applied to sample the Brillouin zone.

## 3. Location of Ga atom in $\text{ZnCr}_2\text{O}_4$ spinel

The possible locations of Ga atom in the doped  $\text{ZnCr}_2\text{O}_4$  proposed above were verified by DFT calculation. When Ga located on the vacancies of  $\text{ZnCr}_2\text{O}_4$  crystal were investigated, the disorder of the spinel was observed obviously, implying that Ga could not exist in the locations of vacancies of ZnCr spinel. So the possible location of ZG and CG are our main consideration. The obtained structures and energies of CG and ZG are listed in Fig.s1 and Table s1. It is obviously show that when the configuration  $\text{Zn}^{2+}$  located in tetrahedron site, a much lower energy was obtained (-438.527 eV vs.-334.680 eV), indicating that  $\text{Ga}^{3+}$  located in the tetrahedron site is the most possible configurations of  $\text{Ga}^{3+}$  doped ZnCr spinel.

Based on the above analysis,  $\text{ZnCr}_2\text{O}_4(111)$ ,  $\text{ZG}(111)$ , and  $\text{ZnGa}_2\text{O}_4(111)$  surfaces were constructed to mimic the surface structure of ZnCr spinel, Ga adopted ZnCr spinel and ZnGa spinel catalysts to further study the absorption and activation of syngas. Configurations of the two model catalyst were listed in Fig. S2. The adsorption of CO, CHO and COH were evaluated with the optimized structure and

adsorption energies listed in Fig. S3. As can be seen in Fig.S3, on both catalyst surface CO prefers to be adsorbed on Cr site with atom C, with the adsorption energy for on the two catalyst surface are 1.20 eV and 2.70 eV respectively, indicating the replacement of  $\text{Zn}^{2+}$  by  $\text{Ga}^{3+}$  is advantageous to CO adsorption. In addition, the analysis to the most stable configurations of CO show that when Zn was replaced by Ga, C=O bond was enlarged from 1.16 Å to 1.17 Å, the distance between C and surface Cr is shortened from 1.98 Å to 1.91 Å. The stretching vibration of C-O bond decreased from 2024  $\text{cm}^{-1}$  in the gas phase to 1979.22  $\text{cm}^{-1}$  on  $\text{ZnCr}_2\text{O}_4$  (111) surface and 1903.68  $\text{cm}^{-1}$  on Zn-Ga (111) surface, which further verify the enhanced adsorption of CO by Ga addition. Formyl group formation through CO hydrogenation was also investigated by CI-NEB analysis. The results show (Fig.S4) that with Ga addition, the reaction energy was reduced from 0.24 eV to -1.05 eV, the activation energy of the two reactions reduced from 0.96 eV to 0.78 eV, indicating CHO formation becomes more preferable with Ga addition.

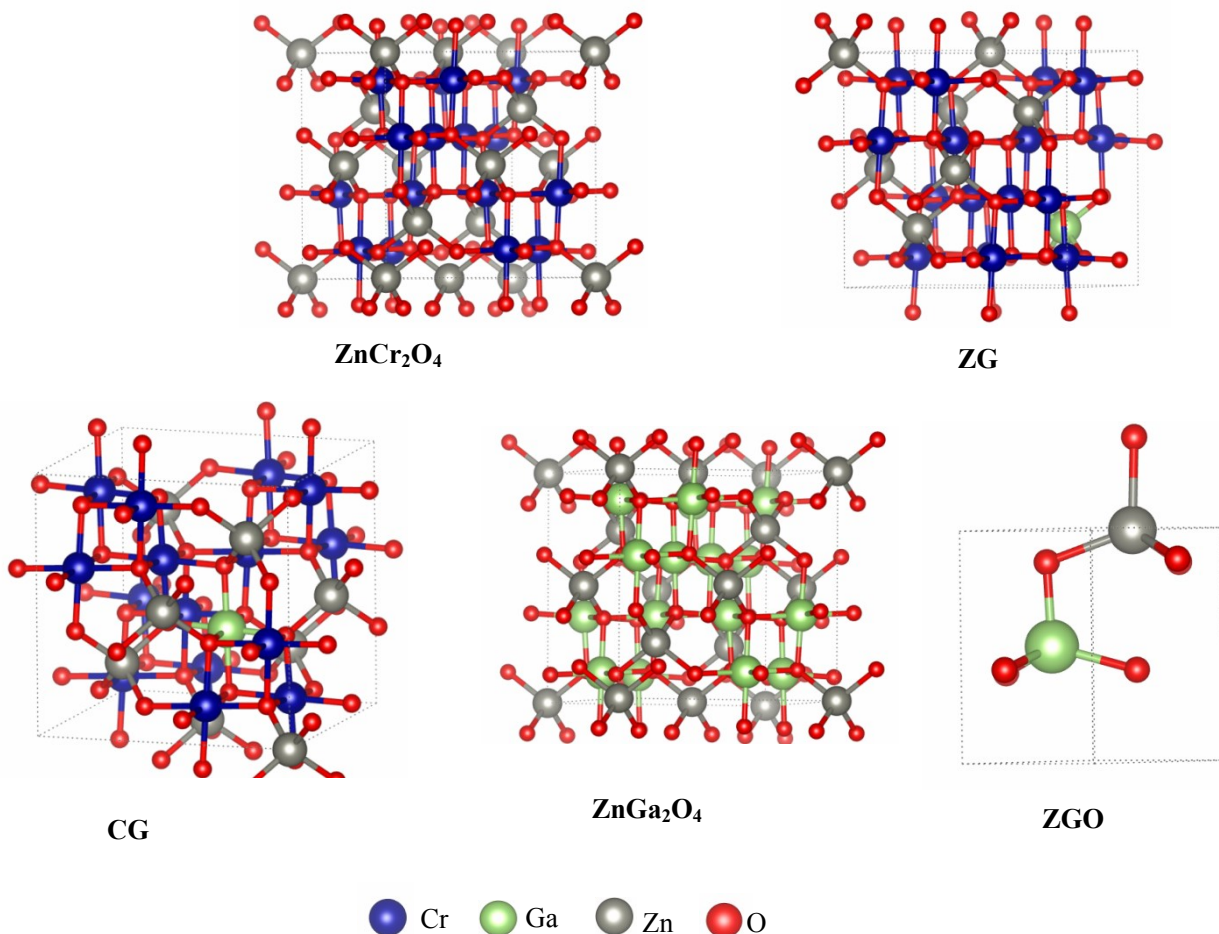

Schematic diagram of crystal structure for  $\text{ZnCr}_2\text{O}_4$ , ZG, CG,  $\text{ZnCa}_2\text{O}_4$  and ZGO.

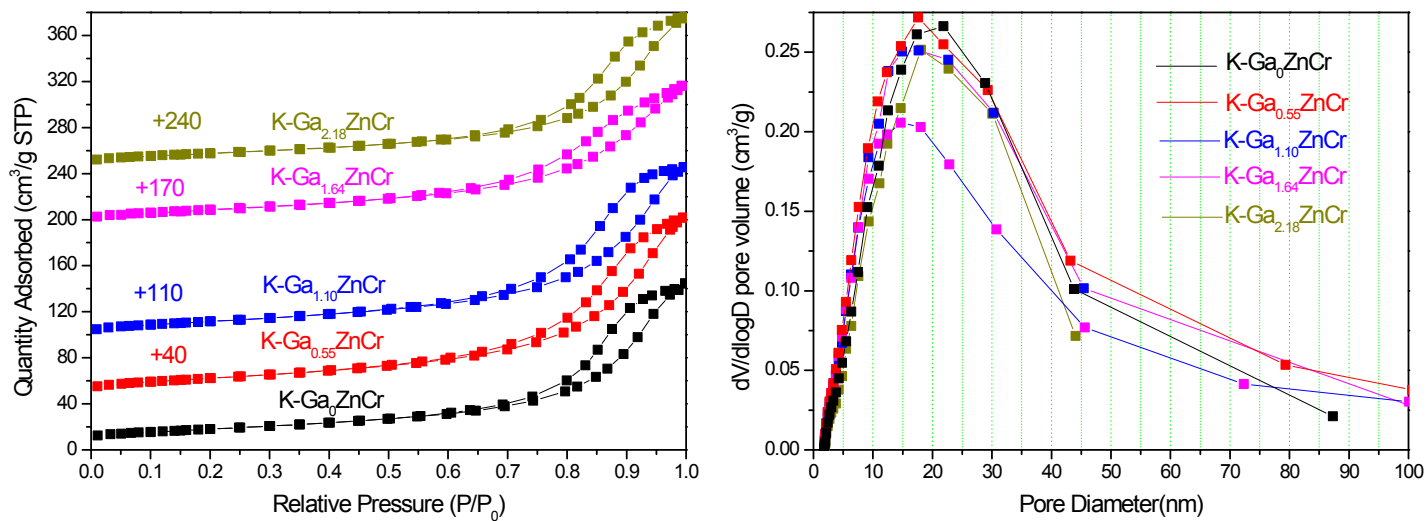

Fig. s1. Isotherm linear plot (left) and BJH desorption of  $dV/dD$  pore volume(right) for K-GaxZnCr samples. ( $x=0.0, 0.55, 1.10, 1.64$  and  $2.18$ )

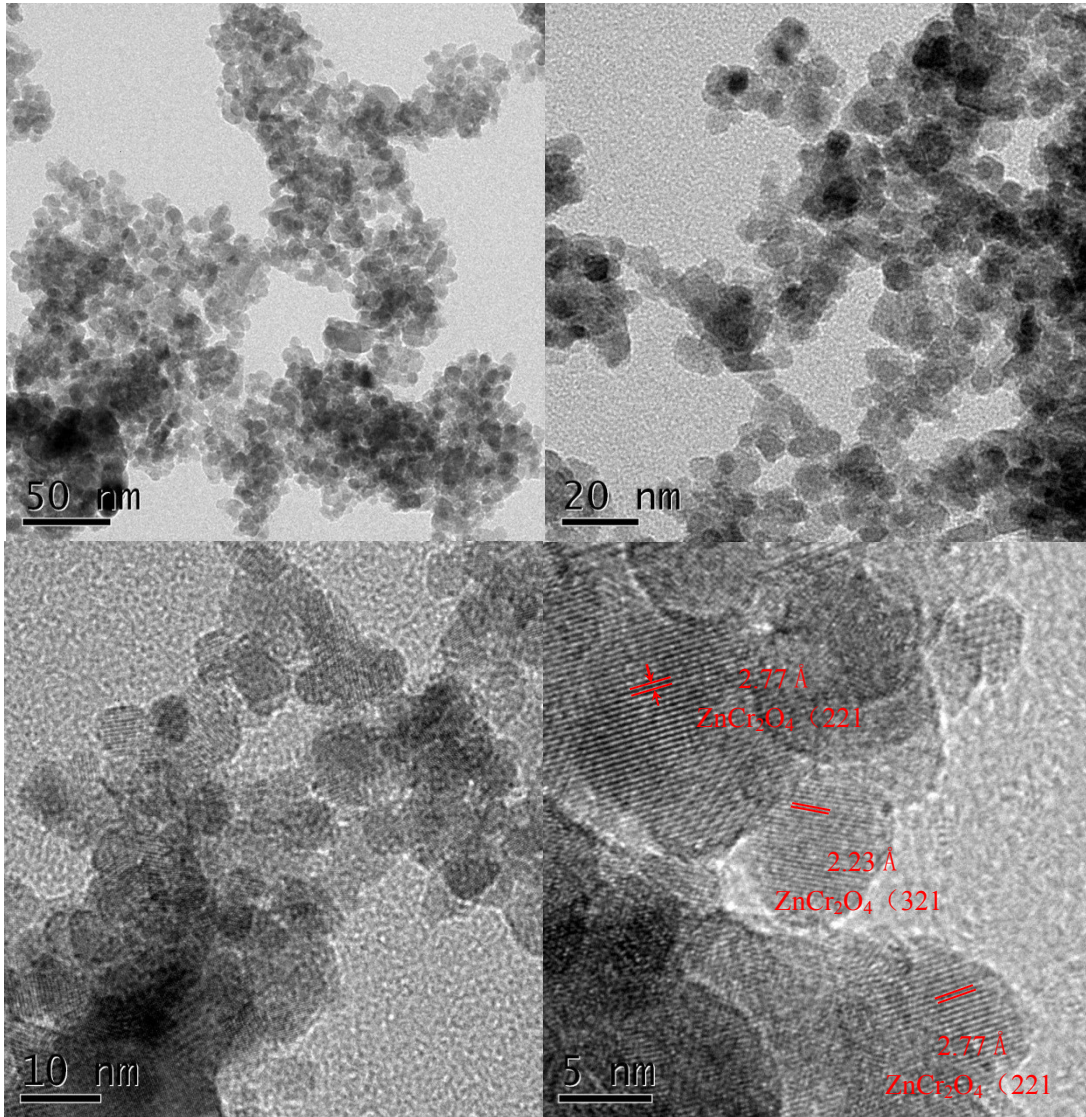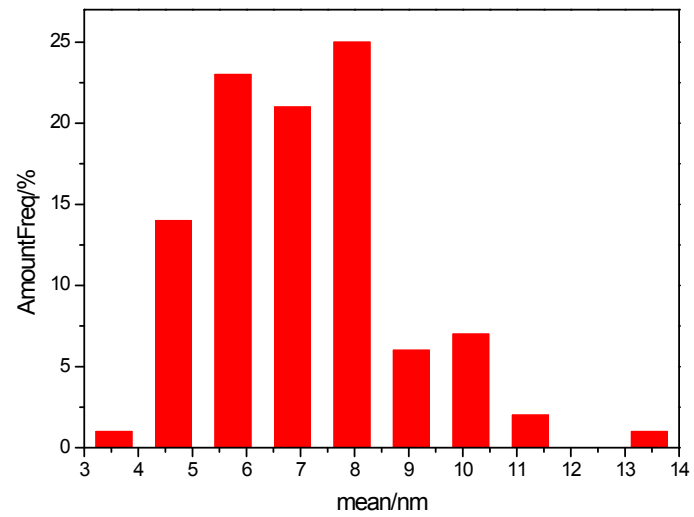

Fig.s2 HR-TEM images of K-Ga<sub>0</sub>ZnCr catalyst.

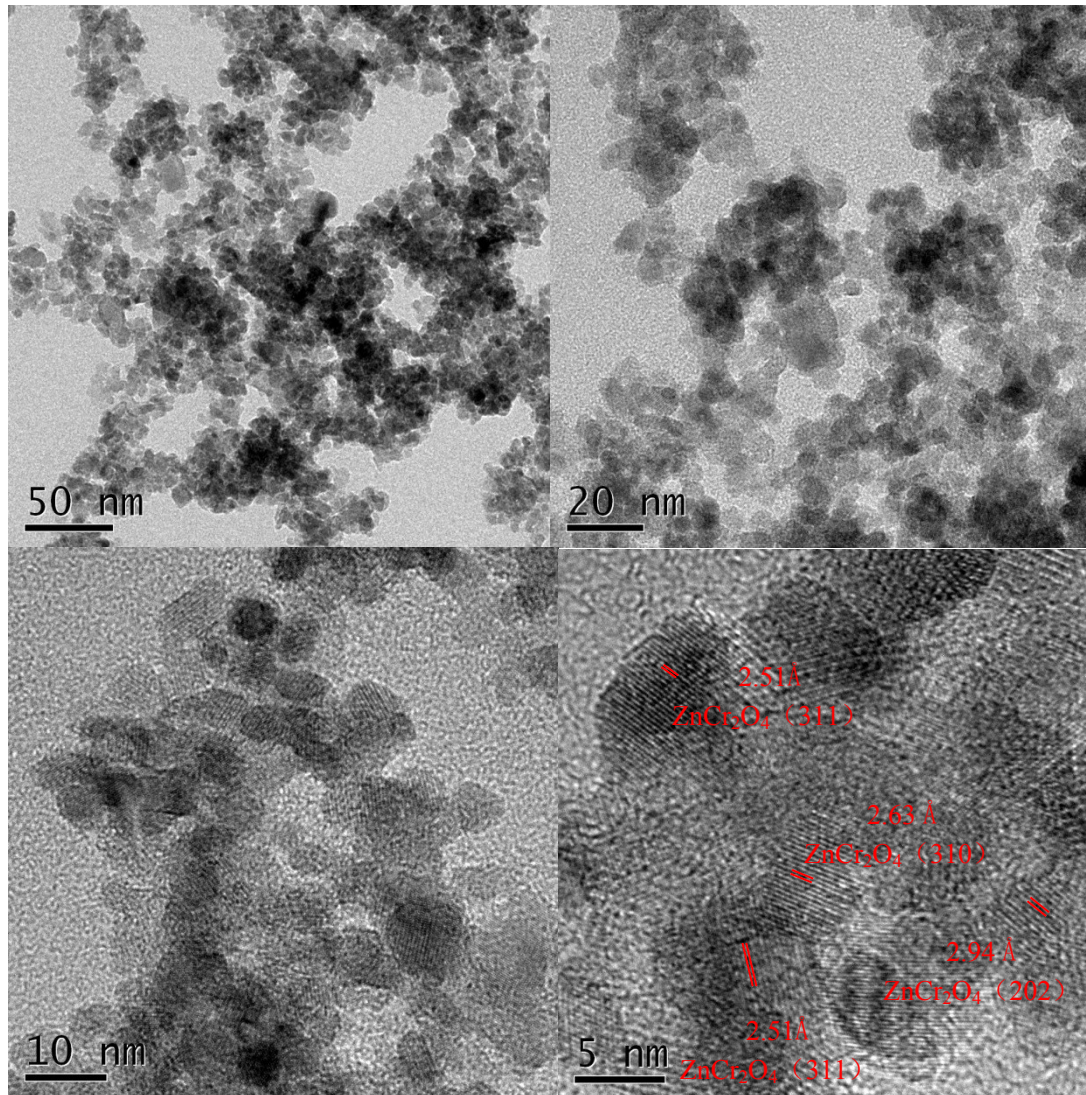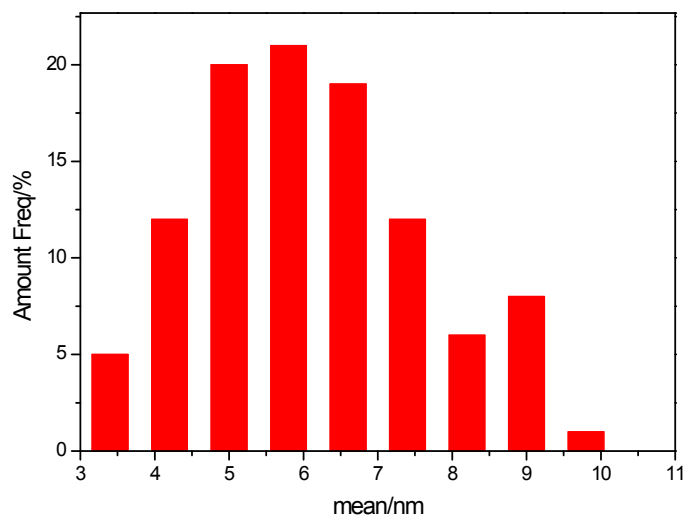

Fig.s3 HR-TEM images of K-Ga<sub>1.10</sub>ZnCr catalyst.

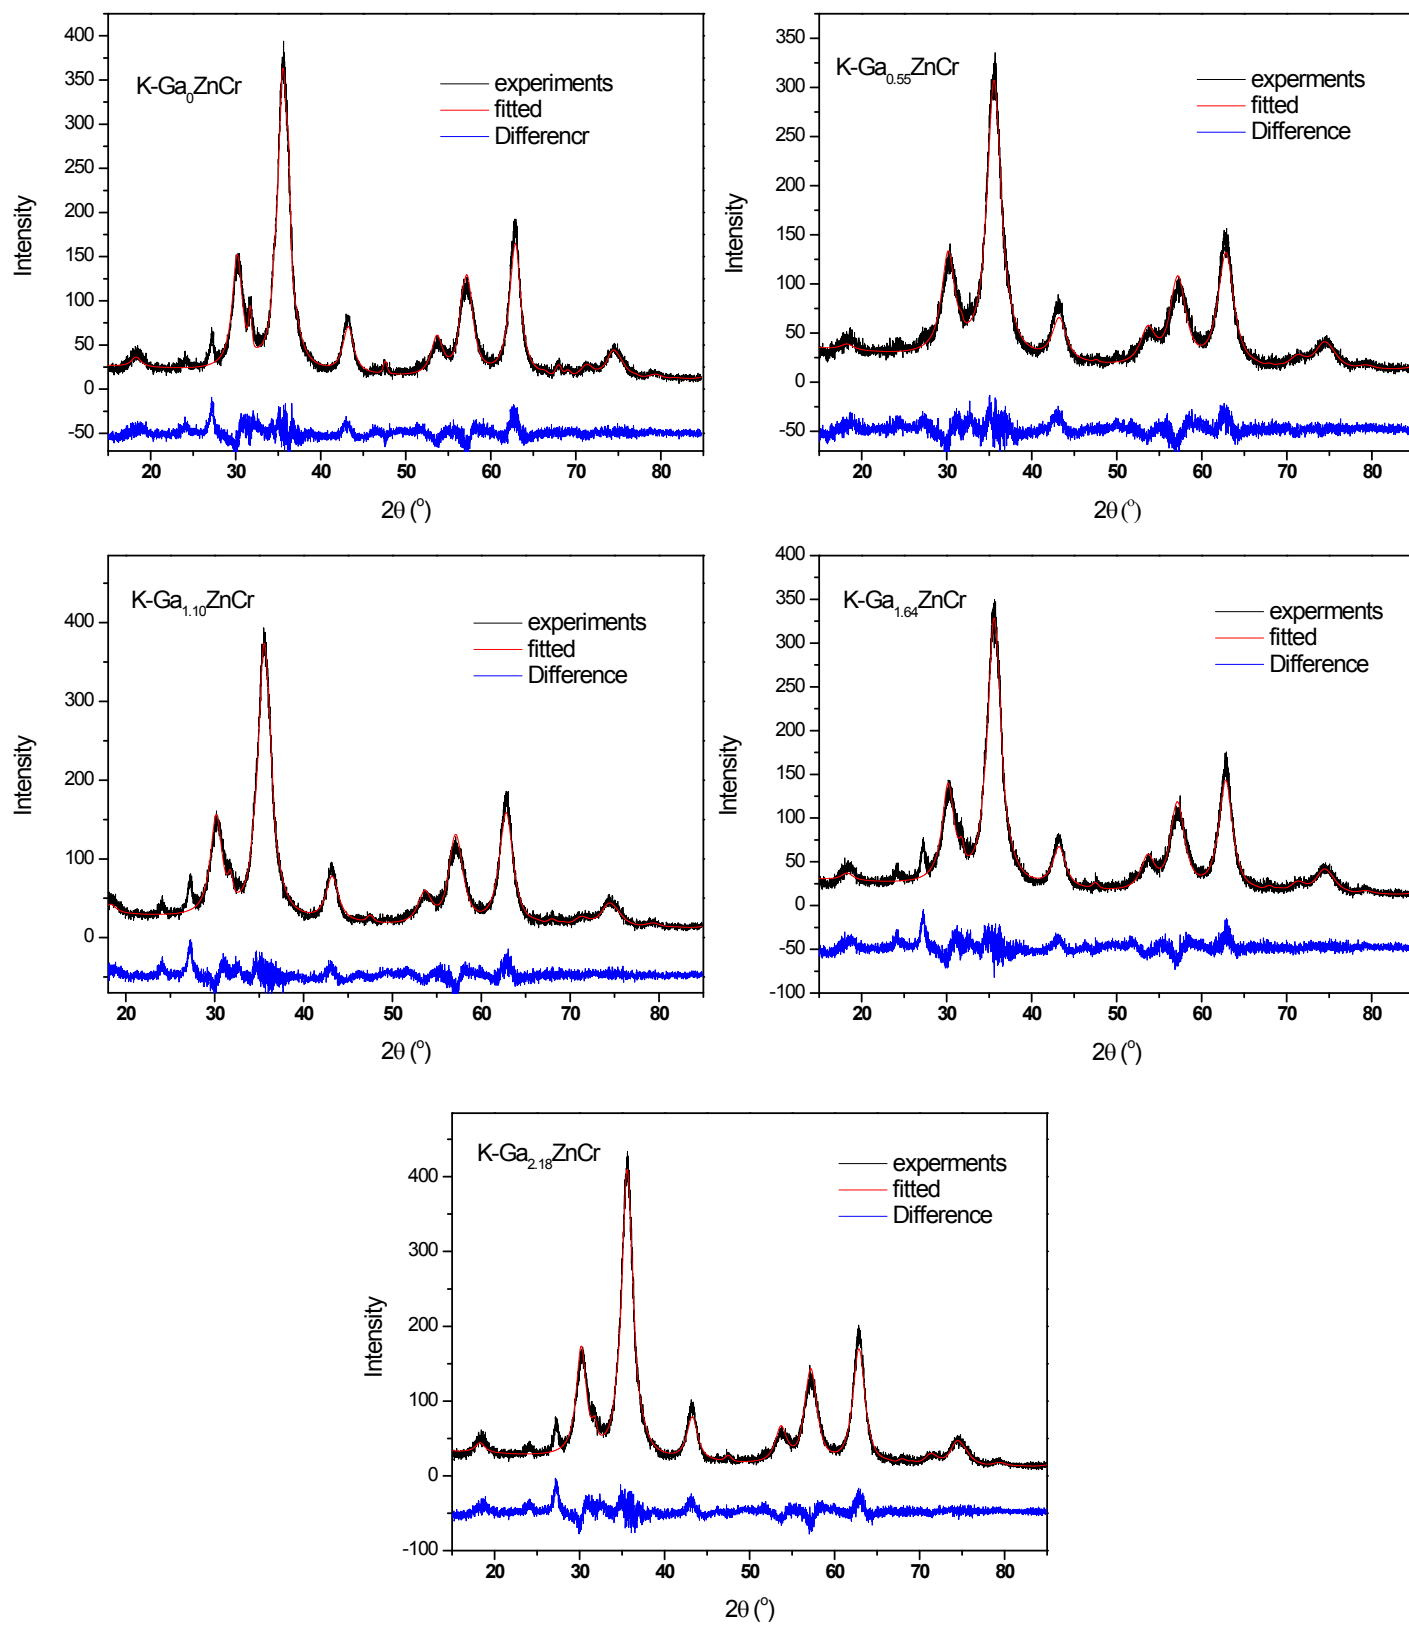



Fig. s4. Rietveld refinement results to the XRD patterns of K-Ga<sub>z</sub>ZnCr catalysts.

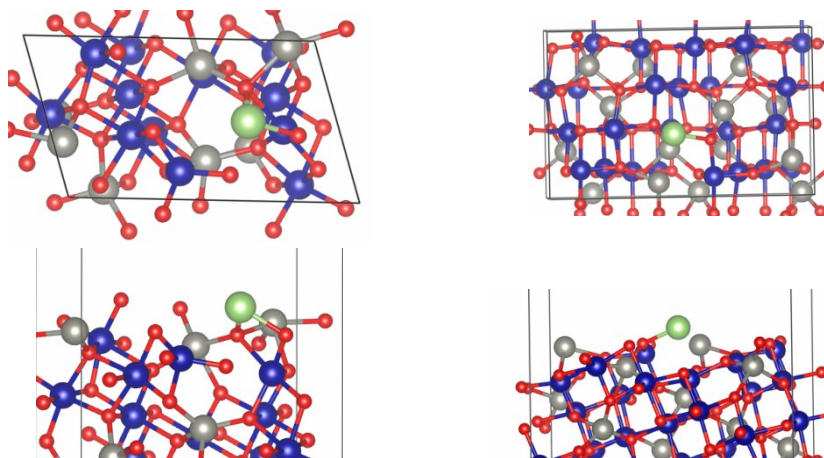

Ga on (311) of ZnCr<sub>2</sub>O<sub>4</sub>

Ga on (310) of ZnCr<sub>2</sub>O<sub>4</sub>

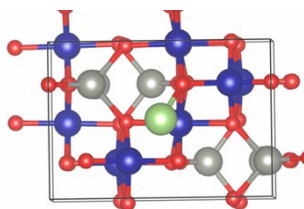

Ga on (202) of ZnCr<sub>2</sub>O<sub>4</sub>

Fig.s5. Top view and side view of the configurations of Ga adsorbed on the (311), (310) and (202) surfaces of ZnCr<sub>2</sub>O<sub>4</sub>.

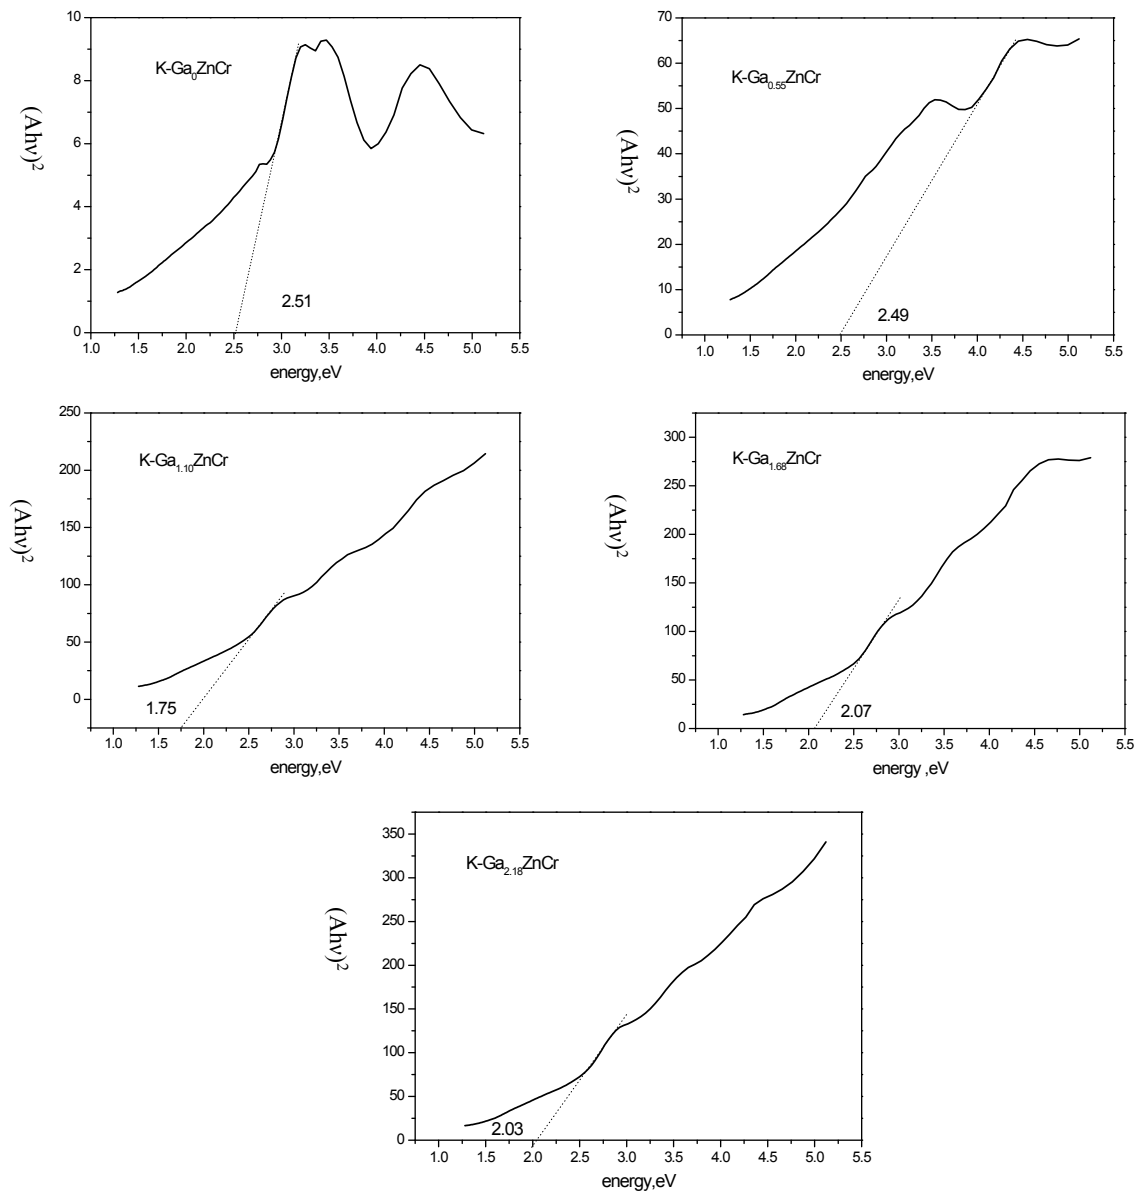

**Fig. s6. Indirect band gap  $E_g$  calculated from ultraviolet-visible diffuse reflectance spectral for K-Ga<sub>x</sub>ZnCr catalysts.**

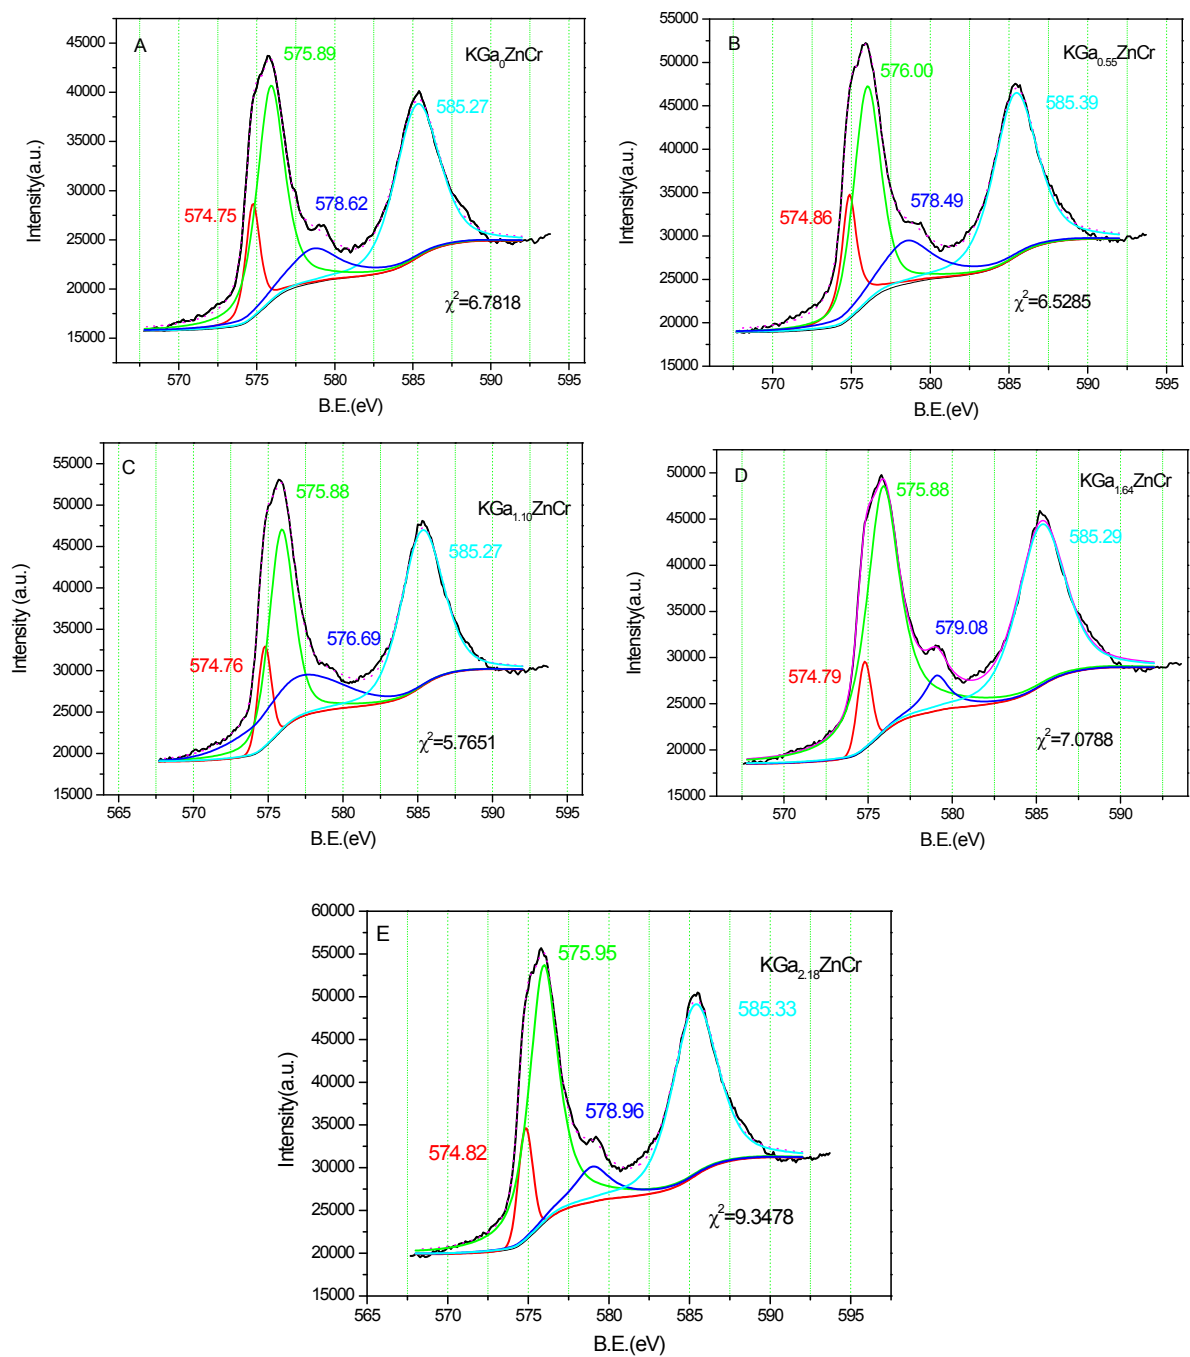

Fig. s7. The XPS spectral of Cr<sub>2p</sub> for K-Ga<sub>x</sub>ZnCr samples. (x=0.0, 0.55, 1.10, 1.64 and 2.18)

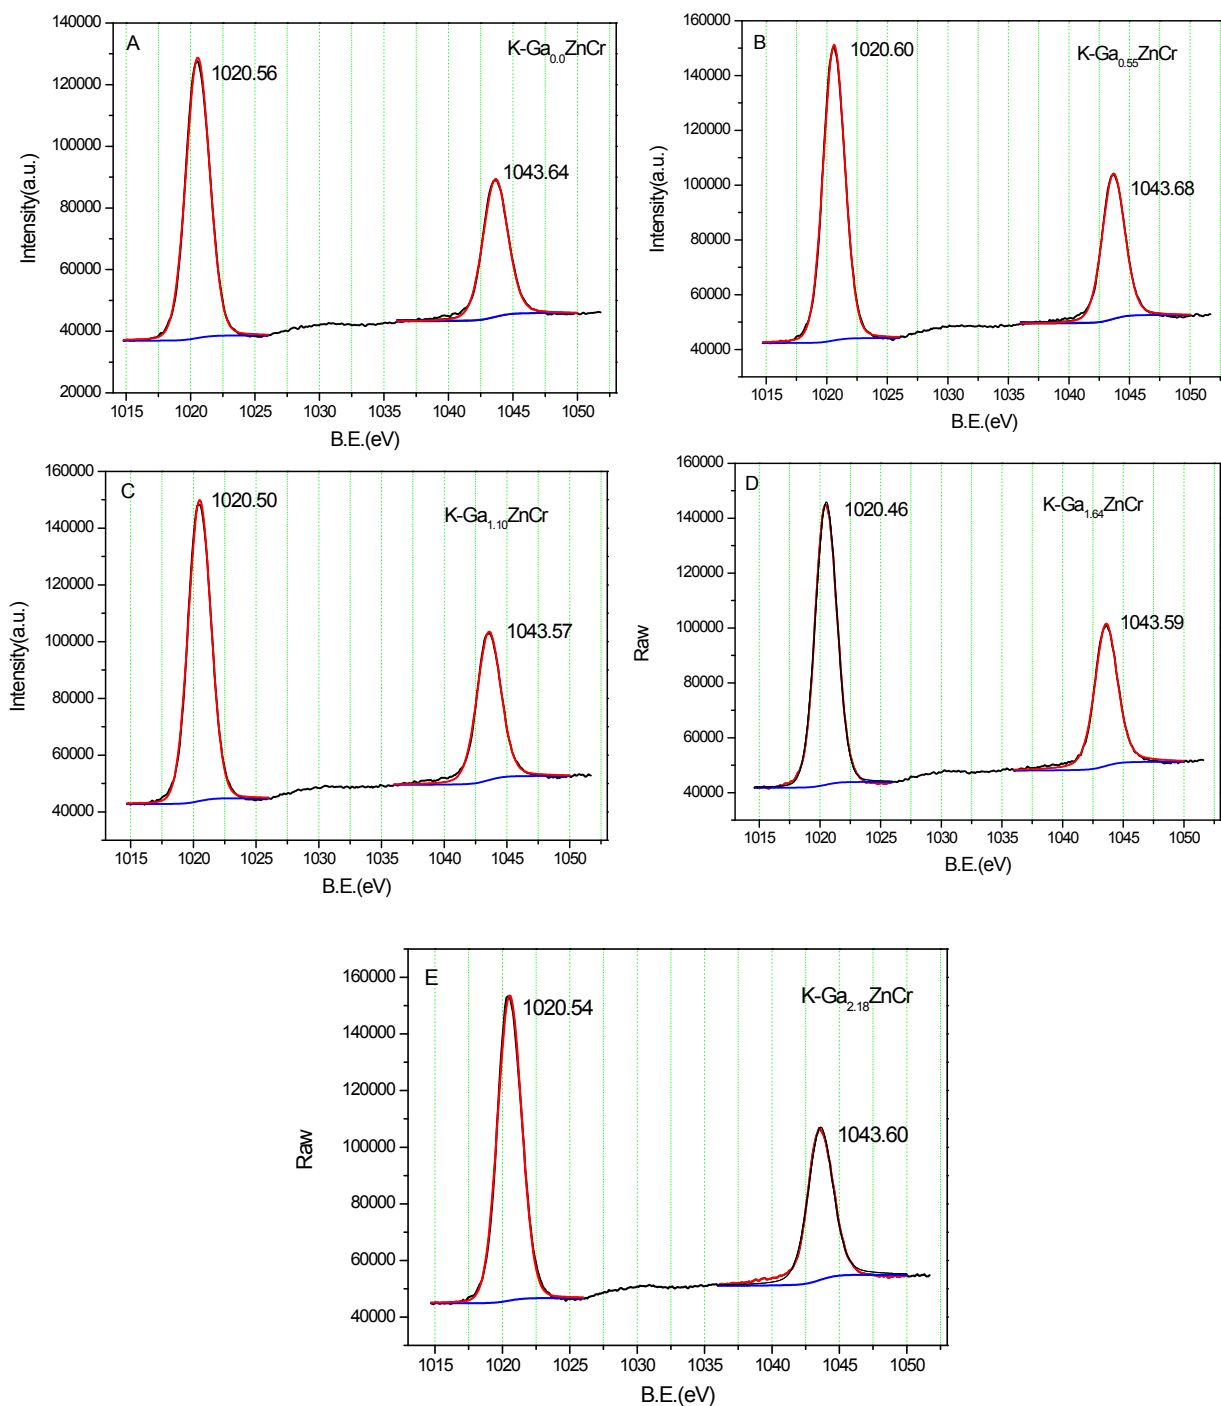

Fig. s8. The XPS spectral of Zn<sub>2p</sub> for K-Ga<sub>x</sub>ZnCr samples. (x=0.0, 0.55, 1.10, 1.64 and 2.18)

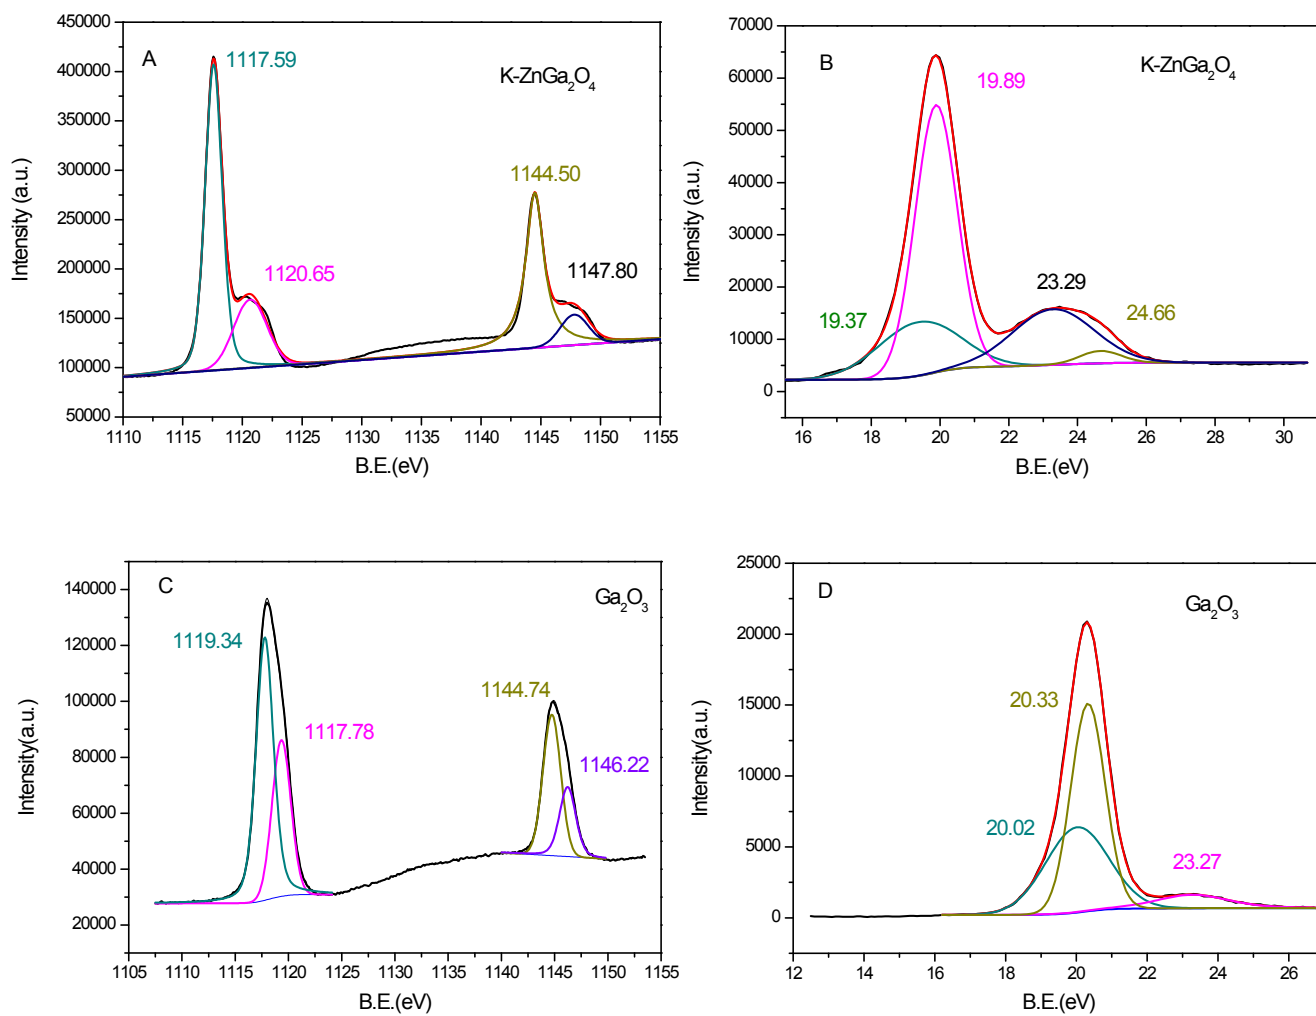

**Fig. s9.** The XPS spectrals of Ga2p for K-ZnGa<sub>2</sub>O<sub>4</sub>(A), Ga<sub>2</sub>O<sub>3</sub>(C) and Ga3d for K-ZnGa<sub>2</sub>O<sub>4</sub> (B), Ga<sub>2</sub>O<sub>3</sub> (D). Ga<sub>2</sub>O<sub>3</sub> (99.99%) was perched from Shanghai Aladdin Biochemical Technology Co.Ltd

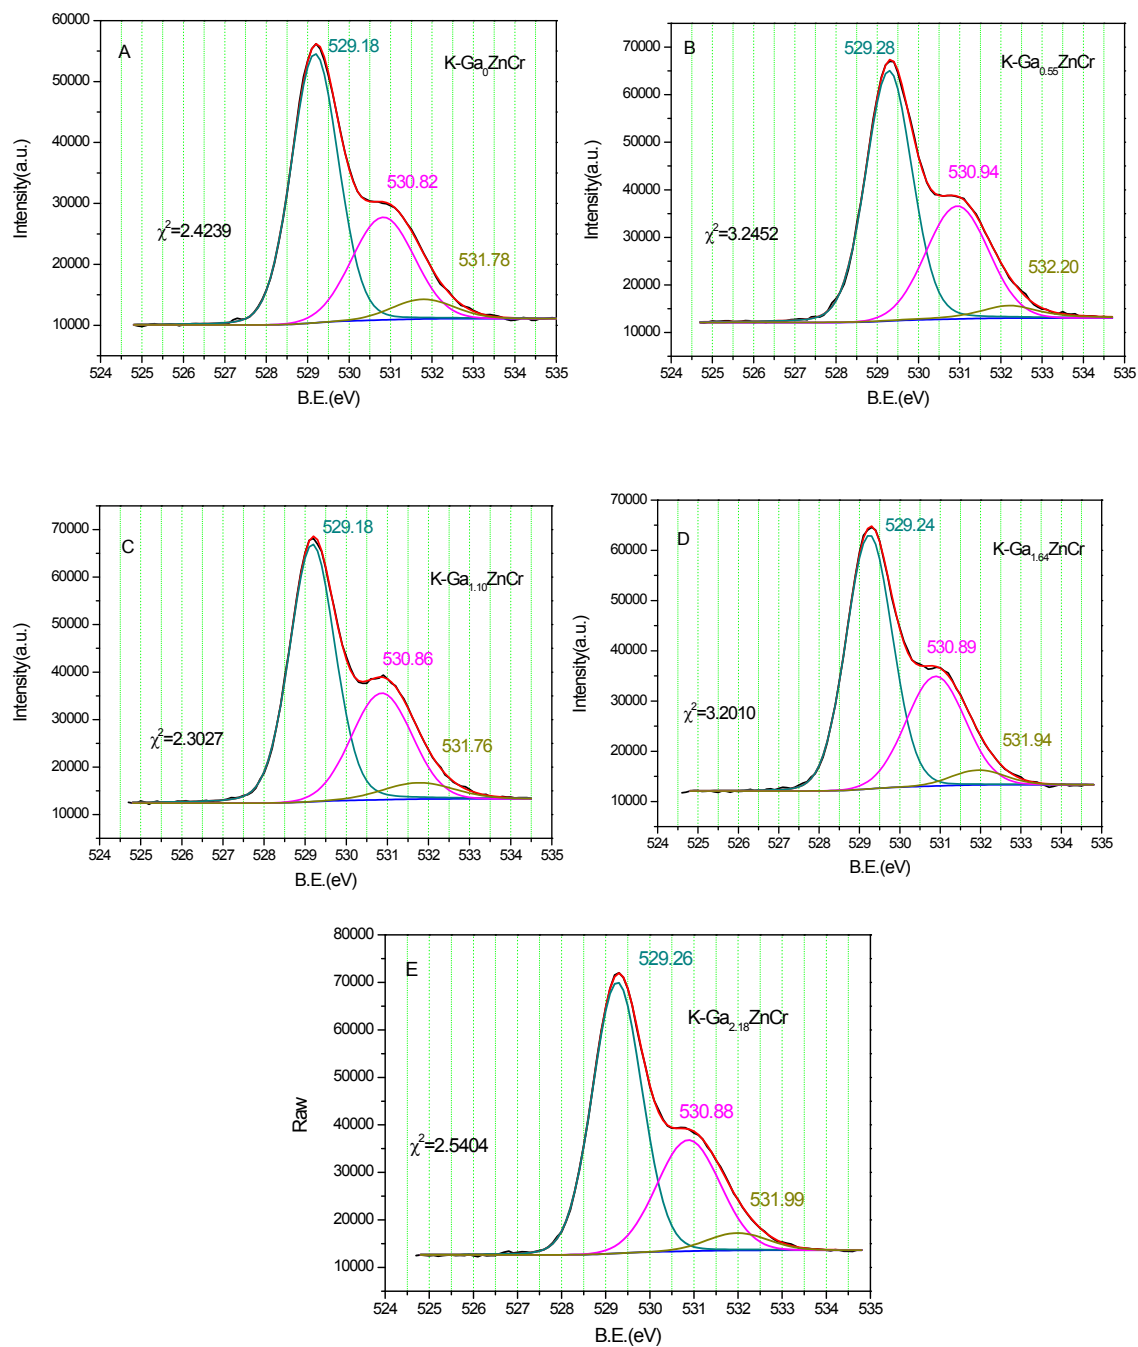

Fig. s10. The XPS spectral of O1s for K-Ga<sub>x</sub>ZnCr samples. (x=0.0, 0.55, 1.10, 1.64 and 2.18)

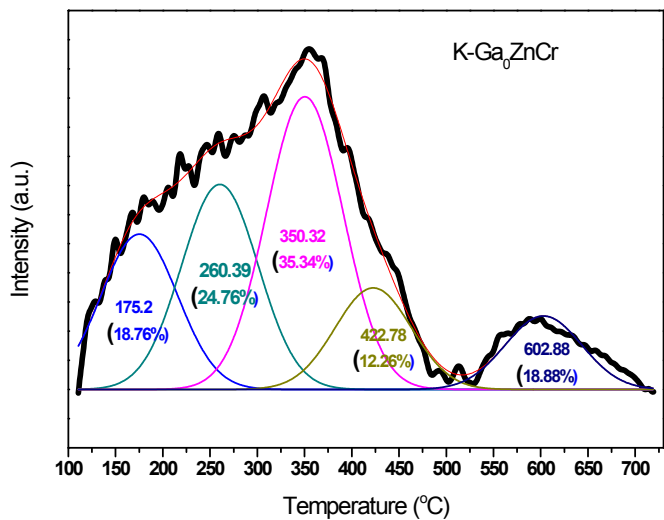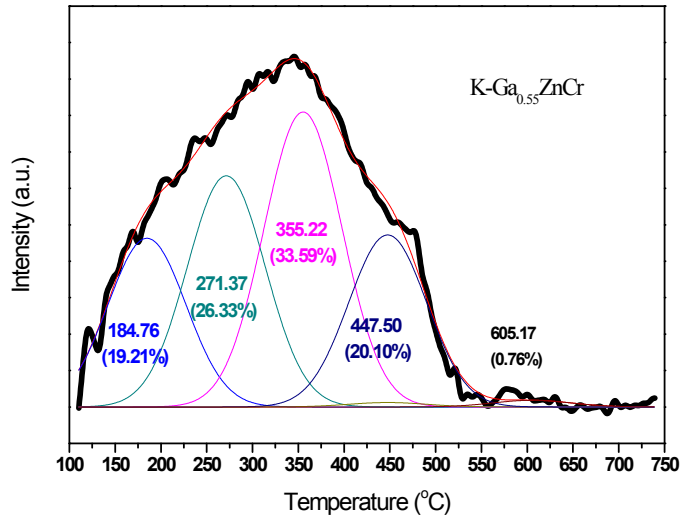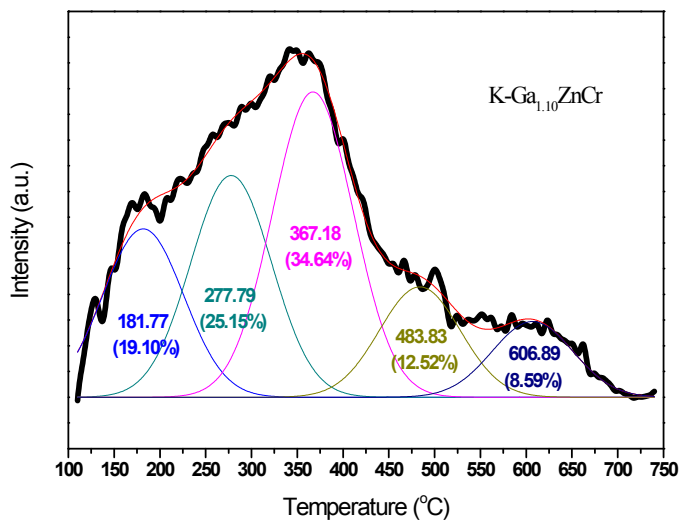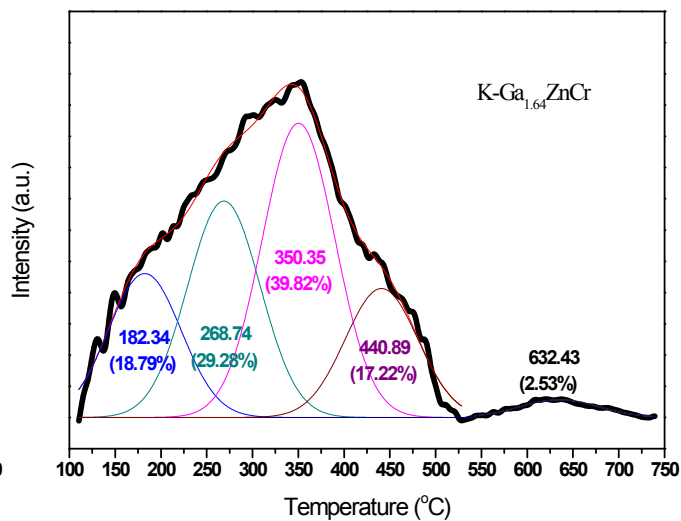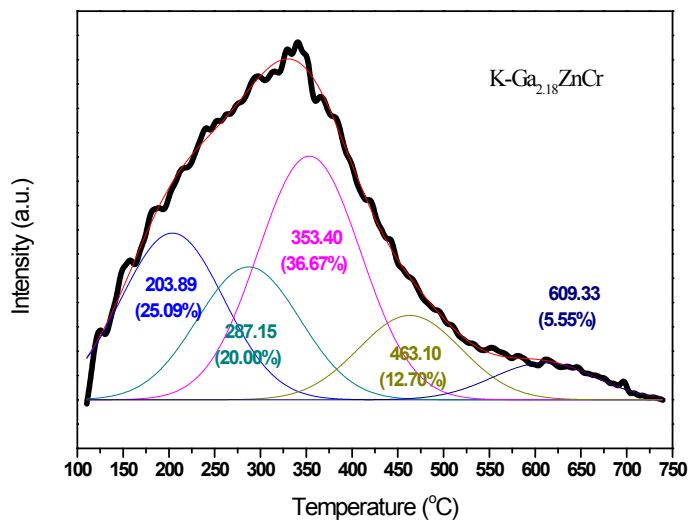

Fig. s11. TheCO<sub>2</sub>-TPR profiles for K-Ga<sub>x</sub>ZnCr samples. (x=0.0, 0.55, 1.10, 1.64 and 2.18)

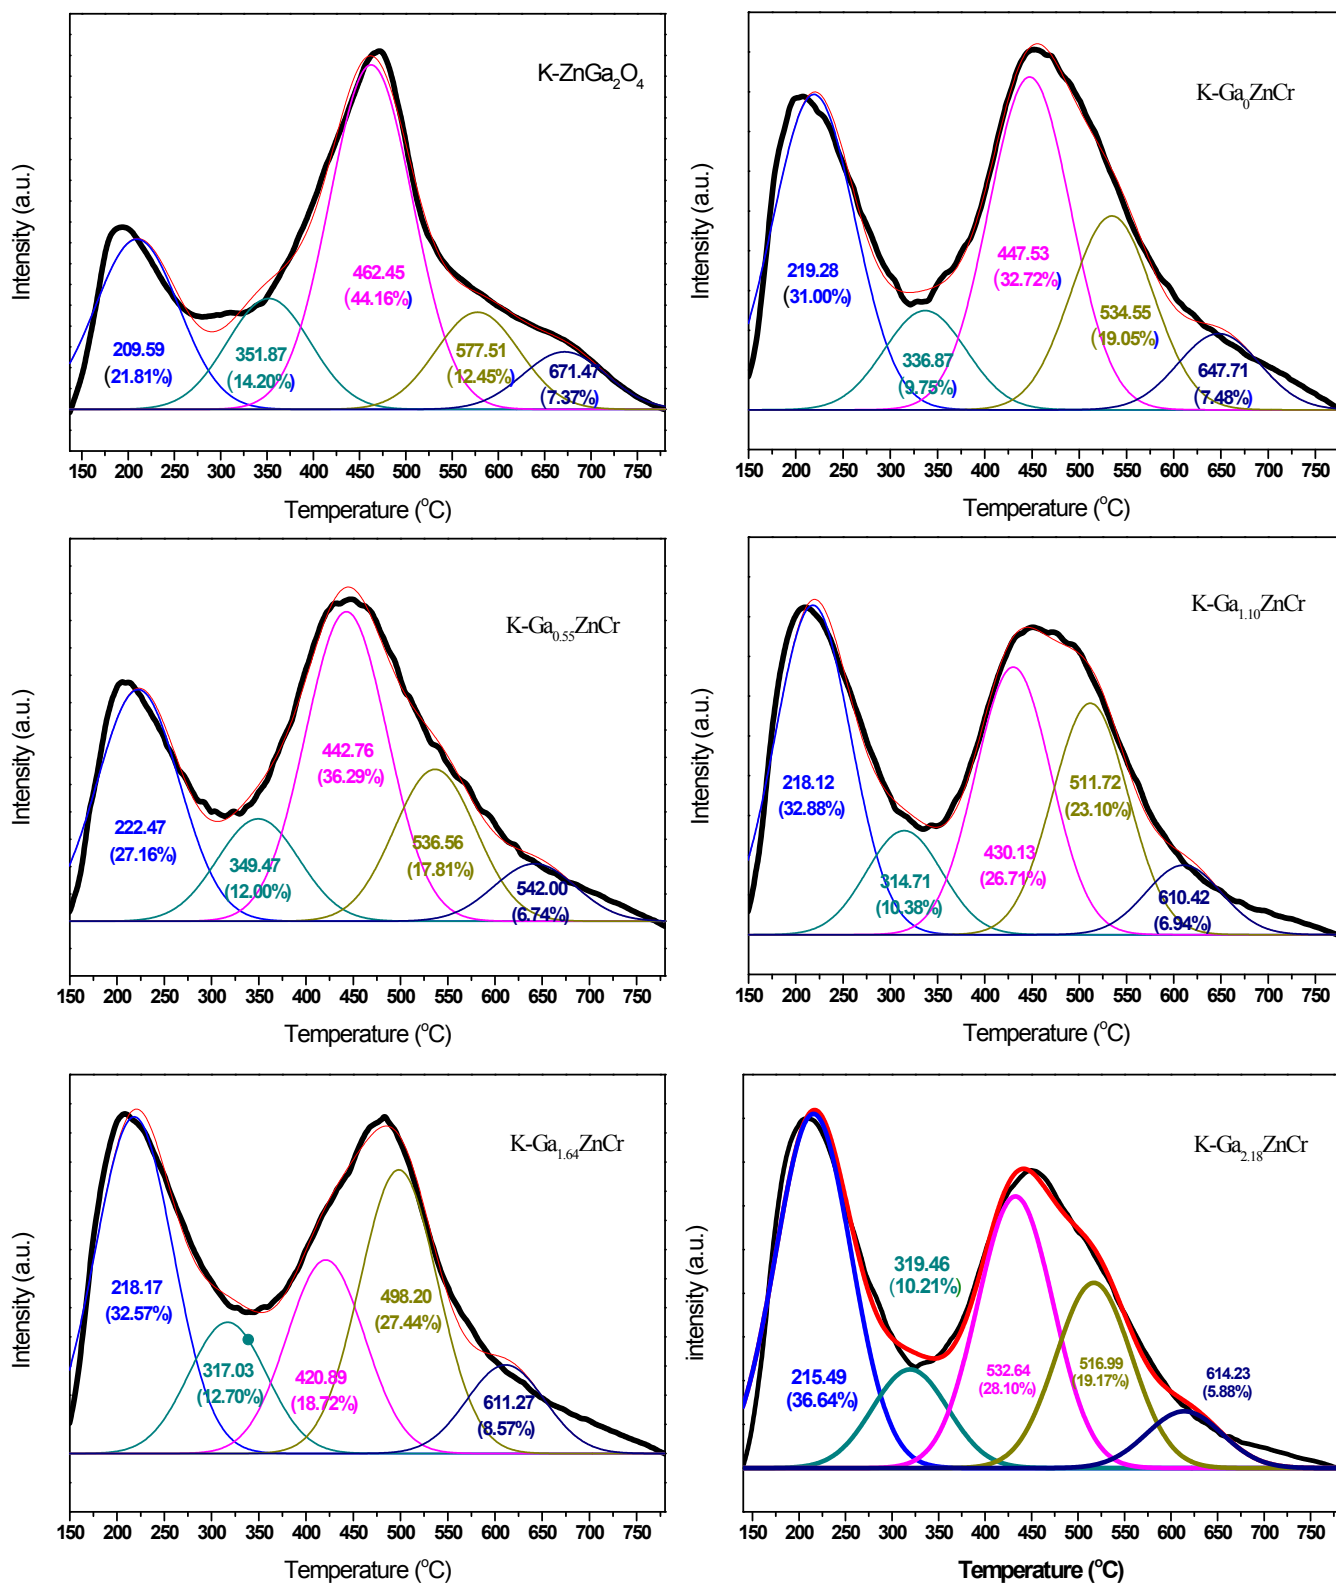



Fig. s12. The NH<sub>3</sub>-TPR profiles for K-ZnGa<sub>2</sub>O<sub>4</sub> and K-Ga<sub>x</sub>ZnCr samples. (x=0.0, 0.55, 1.10, 1.64 and 2.18)

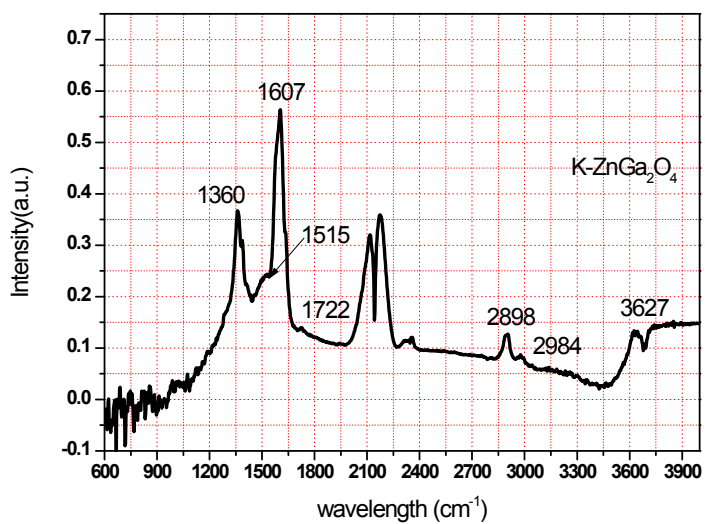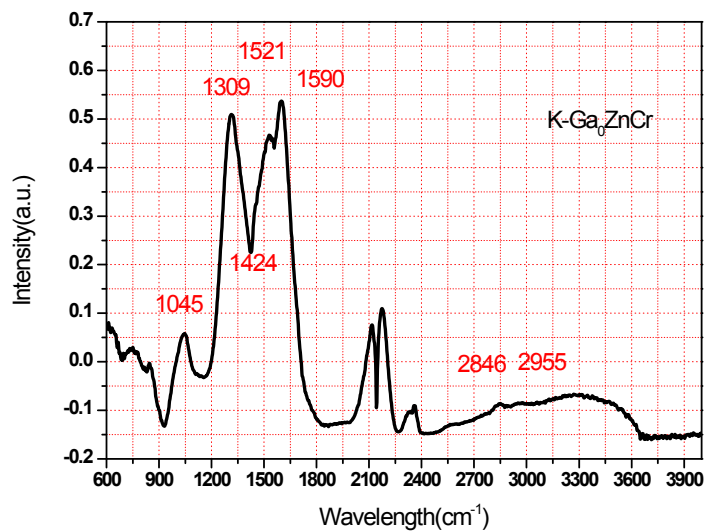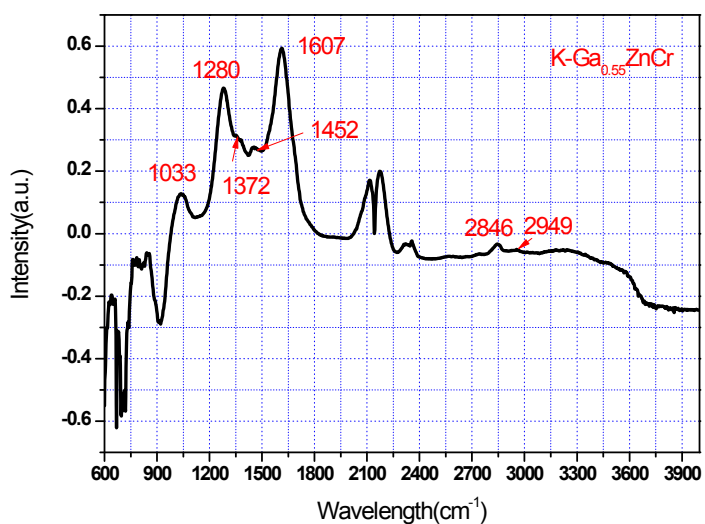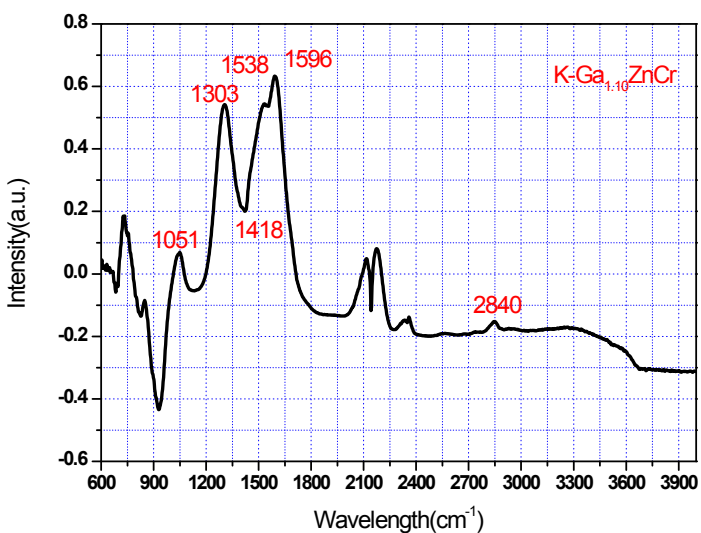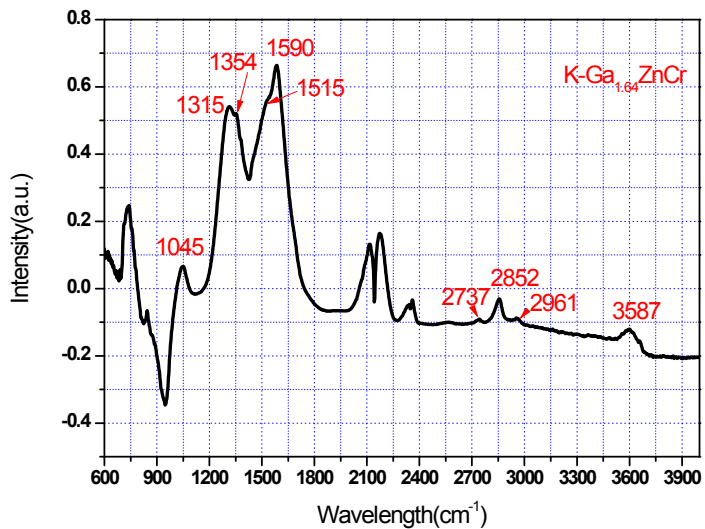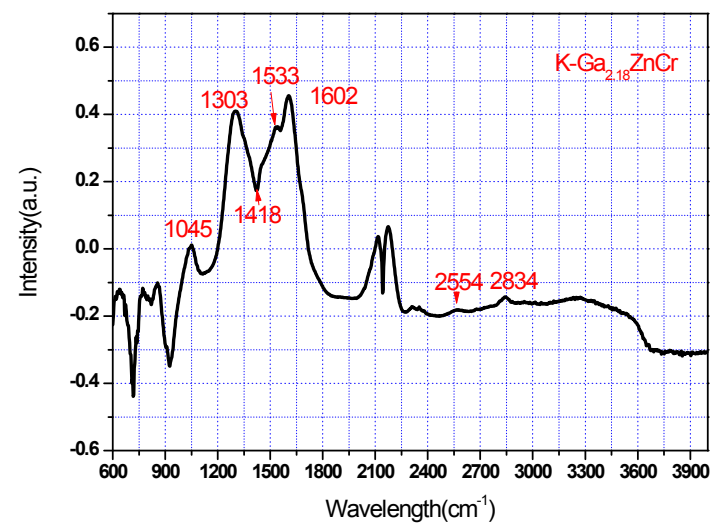

Fig. s13. DRIFT spectral of CO absorption on K-ZnGa<sub>2</sub>O<sub>4</sub> and K-Ga<sub>x</sub>ZnCr samples and 400 °C. (x=0.0, 0.55, 1.10, 1.64 and 2.18)

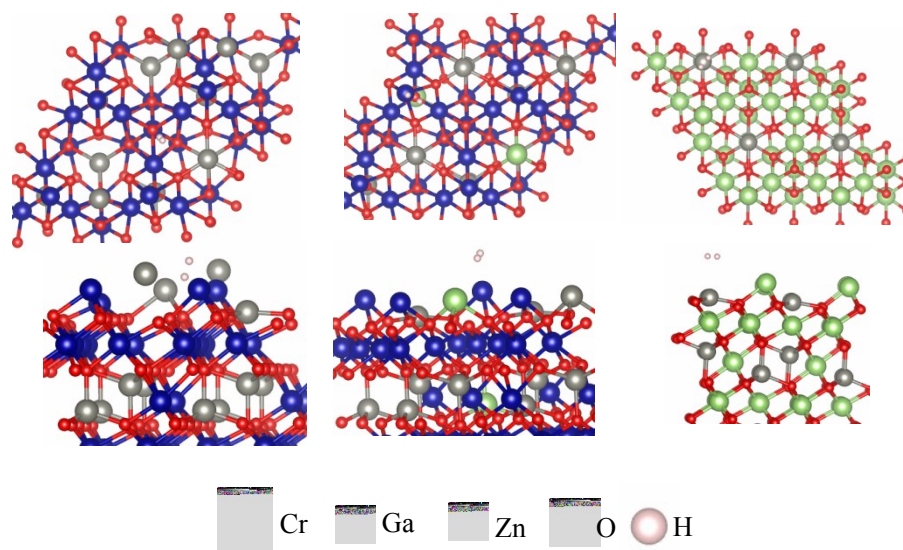

Fig. s14. The most stable adsorption configurations of H<sub>2</sub> on ZnCr<sub>2</sub>O<sub>4</sub> (111) surface, ZG(111) surface, and ZnGa<sub>2</sub>O<sub>4</sub> (111) surface.

| surface                                | $E_{\text{ads}}$ , eV | $d_{\text{H-Me}}$ | $d_{\text{H-H}}$ | frequency, $\text{cm}^{-1}$<br>$\nu_{\text{H-H}}, \delta_{\text{H-H}}$ |
|----------------------------------------|-----------------------|-------------------|------------------|------------------------------------------------------------------------|
| ZG (111)                               |                       |                   |                  |                                                                        |
| ZnCr <sub>2</sub> O <sub>4</sub> (111) | -2.84                 | 1.98, 1.95        | 0.79             | 3647.45,<br>1153.53                                                    |
| ZnGa <sub>2</sub> O <sub>4</sub> (111) | -1.01                 | 2.57, 2.57        | 0.76             | 4122.89                                                                |

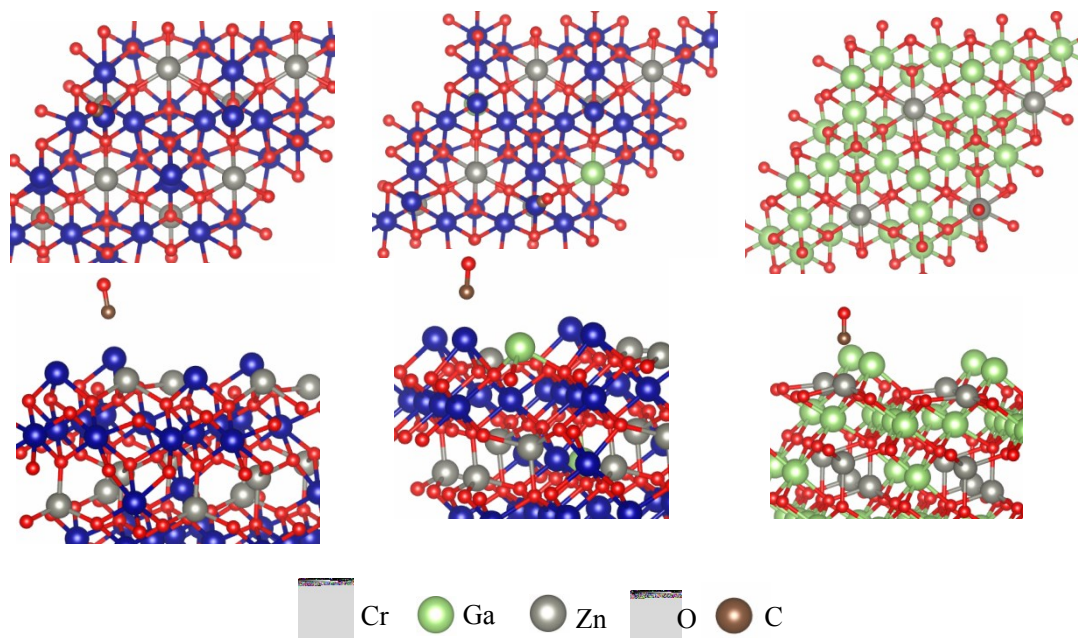

**Fig. s15.** The most stable adsorption configurations of CO on  $\text{ZnCr}_2\text{O}_4$  (111) surface, ZG(111) surface, and  $\text{ZnGa}_2\text{O}_4$  (111) surface.

| surface                         | $E_{\text{ads}}$ , eV | $d_{\text{C-Me}}$ | $d_{\text{O-C}}$ | frequency, $\text{cm}^{-1}$<br>$\nu_{\text{CO}}$ |
|---------------------------------|-----------------------|-------------------|------------------|--------------------------------------------------|
| ZG (111)                        |                       | 1.958             | 1.169            | 1931.64                                          |
| $\text{ZnCr}_2\text{O}_4$ (111) | -0.71                 | 1.978             | 1.161            | 1979.21                                          |
| $\text{ZnGa}_2\text{O}_4$ (111) | -0.36                 | 2.133             | 1.142            | 2110.31                                          |
| CO                              |                       |                   | 1.13             | 2124.27                                          |

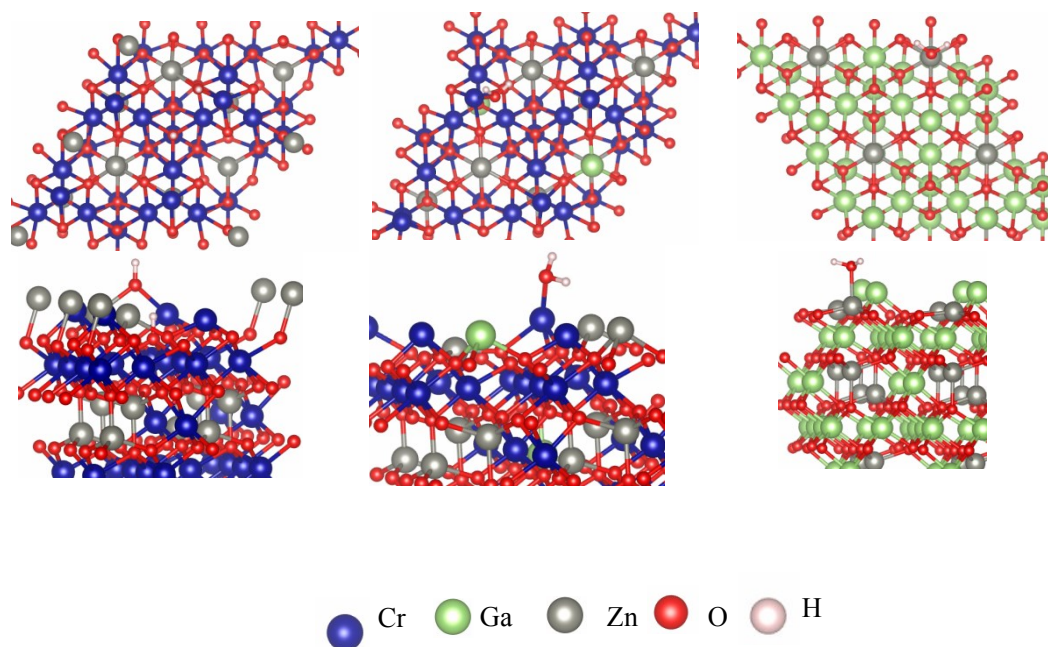

**Fig. s16.** The most stable adsorption configurations of H<sub>2</sub>O on ZnCr<sub>2</sub>O<sub>4</sub> (111) surface, ZG(111) surface, and ZnGa<sub>2</sub>O<sub>4</sub> (111) surface.

| surface                                | $\angle$ HOH | $d_{\text{O-Me}}$         | $d_{\text{O-H}}$ | frequency, cm <sup>-1</sup><br>$\nu_{\text{OH}}, \nu_{\text{SHOH}}$ |
|----------------------------------------|--------------|---------------------------|------------------|---------------------------------------------------------------------|
| ZG (111)                               | 107.58       | 2.067                     | 0.99, 1.01       | 3421.59, 3037.90, 1506.56                                           |
| ZnCr <sub>2</sub> O <sub>4</sub> (111) |              | Cr-O=1.99,<br>Zn14-O=2.07 | 0.97, 0.97       | 3756.69, 3659.04                                                    |
| ZnGa <sub>2</sub> O <sub>4</sub> (111) | 106.31       | 2.143                     | 0.98, 0.98       | 3592.07, 3485.48, 1564.54                                           |
| H <sub>2</sub> O                       | 103.54       |                           | 0.97, 0.98       | 3839.34, 3726.90, 1585.94                                           |

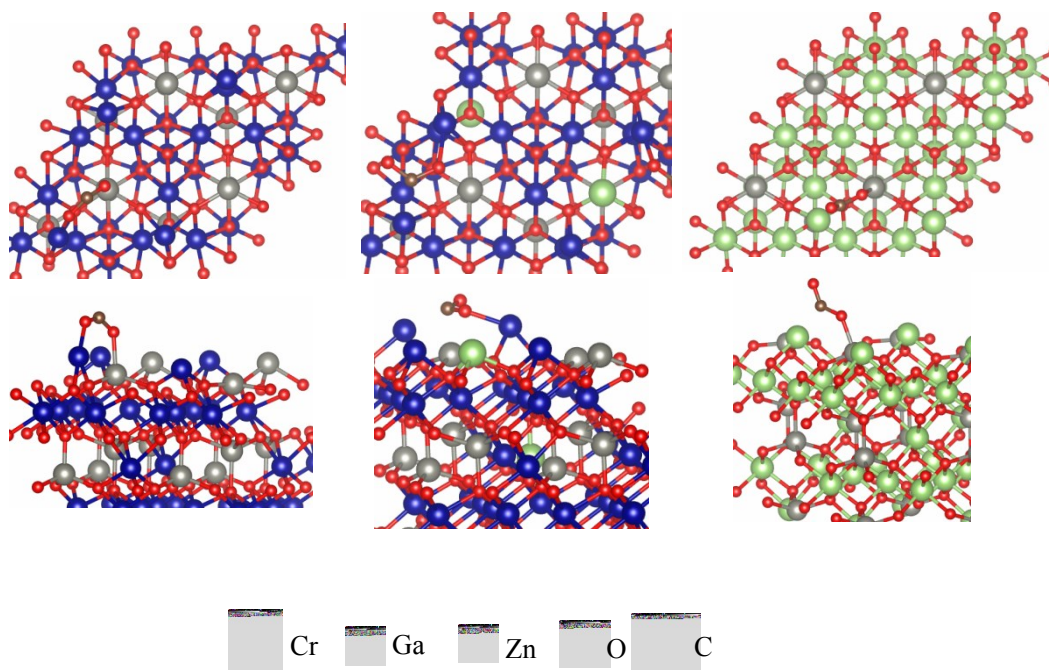

**Fig. s17. The most stable adsorption configurations of CO<sub>2</sub> on ZnCr<sub>2</sub>O<sub>4</sub> (111) surface, ZG(111) surface, and ZnGa<sub>2</sub>O<sub>4</sub> (111) surface.**

| surface                                | $\angle\text{OCO}$ | $d_{\text{O-Me}}$      | $d_{\text{O-C}}$ | frequency, $\text{cm}^{-1}$<br>$\nu_{\text{sc-o}}, \delta_{\text{o-c-o}}$ |
|----------------------------------------|--------------------|------------------------|------------------|---------------------------------------------------------------------------|
| ZG (111)                               | 118.95             | Cr-C=2.102             | 1.30, 1.31       | 1271.07, 1206.28                                                          |
| ZnCr <sub>2</sub> O <sub>4</sub> (111) | 135.53             | Cr-O=2.018, Zn-O=2.062 | 1.25, 1.25       | 1695.70, 1239.66, 688.63                                                  |
| ZnGa <sub>2</sub> O <sub>4</sub> (111) | 132.51             | Zn-O=2.024             | 1.28, 1.21       | 1759.64, 1163.02, 713.83                                                  |
| CO <sub>2</sub>                        | 178.95             |                        | 1.17, 1.19       | 2357.43, 1317.91, 629.92, 627.55                                          |

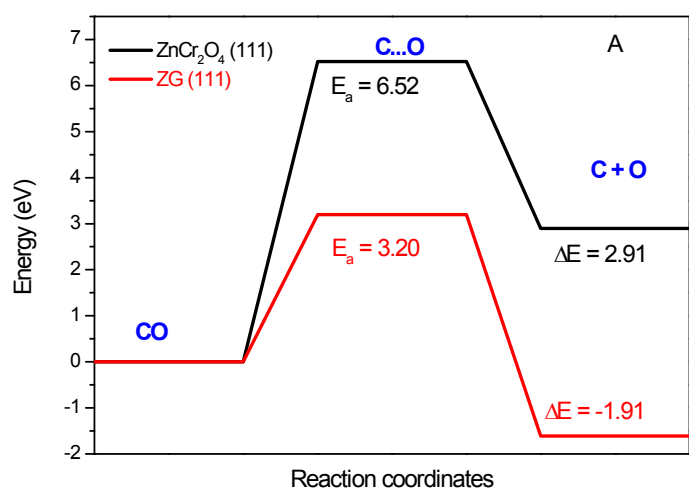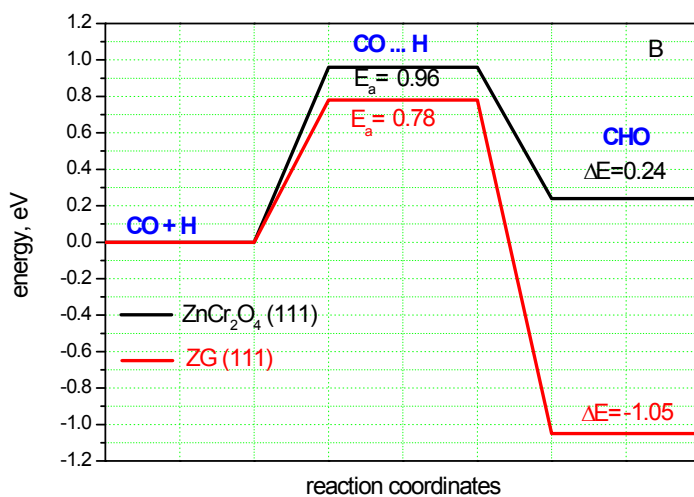

Fig. s18. Reaction coordinates of direct dissociation of CO (A) and CHO formation (B) on ZnCr<sub>2</sub>O<sub>4</sub>(111) and ZG(111) surfaces.

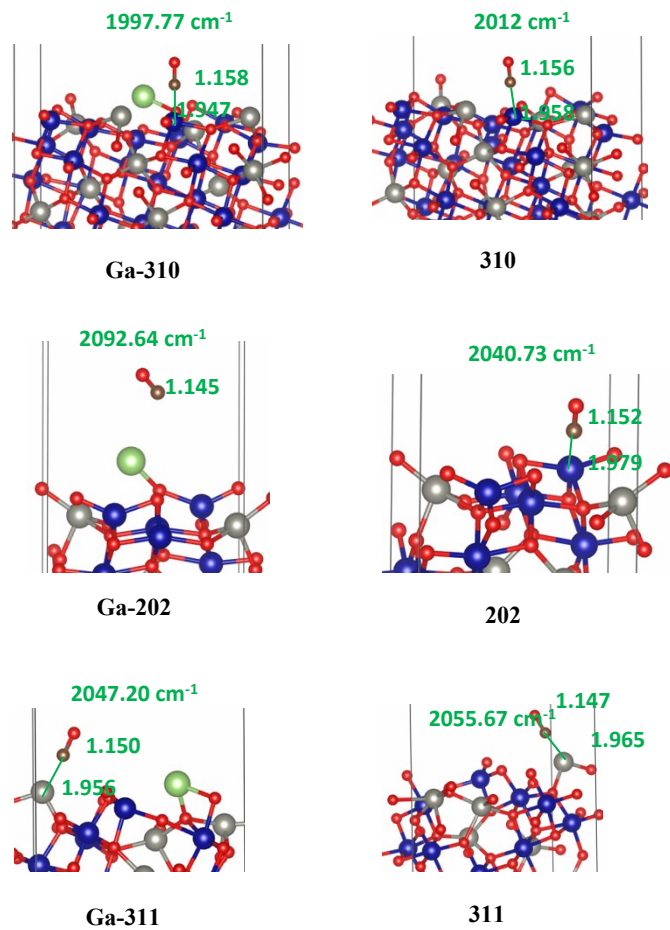

**Fig.s19.** The adsorption configurations and vibrational frequency of CO on (310), (202) and (311) surfaces of  $\text{ZnCr}_2\text{O}_4$  and  $\text{Ga-ZnCr}_2\text{O}_4$ .

**Table s1. The Rietveld refinement results by MAUD software for K-Ga<sub>x</sub>ZnCr samples. (x=0.0, 0.55, 1.10, 1.64 and 2.18).**

| catalyst                         | ZnCr <sub>2</sub> O <sub>4</sub> |         | ZnO    |        |               | sig    | R <sub>wp</sub> |
|----------------------------------|----------------------------------|---------|--------|--------|---------------|--------|-----------------|
|                                  | a                                | wt.%    | a      | c      | wt.%          |        |                 |
| K-Ga <sub>0</sub> ZnCr           | 8.3629                           | 95.2054 | 3.2540 | 5.1914 | 4.7946±0.0950 | 0.8614 | 12.6072         |
| K-Ga <sub>0.55</sub> ZnCr        | 8.3645                           | 99.3184 | 3.2540 | 5.1914 | 0.6816±0.0761 | 0.8076 | 11.4636         |
| K-Ga <sub>1.10</sub> ZnCr        | 8.3661                           | 95.6749 | 3.2481 | 5.2171 | 4.3251±0.1264 | 0.8823 | 12.2794         |
| K-Ga <sub>1.64</sub> ZnCr        | 8.3637                           | 96.7516 | 3.2481 | 5.2171 | 3.2484±0.1153 | 0.8700 | 12.4247         |
| K-Ga <sub>2.18</sub> ZnCr        | 8.3590                           | 96.4870 | 3.2481 | 5.2171 | 3.5130±0.1128 | 0.8716 | 12.1301         |
| ZnO                              |                                  |         | 3.2200 | 5.2000 |               |        |                 |
| ZnCr <sub>2</sub> O <sub>4</sub> | 8.3271                           |         |        |        |               |        |                 |



**Table s2. The total energy  $E_t$ , binding energy  $E_B$ , and reaction energy  $E_r$  for GaZnCr related reactions.**

| species or reactions                                                                                           | energy, eV |          |          |
|----------------------------------------------------------------------------------------------------------------|------------|----------|----------|
|                                                                                                                | $E_t$      | $E_B$    | $E_f$    |
| Zn <sup>2+</sup>                                                                                               | -0.1645    |          |          |
| Cr <sup>3+</sup>                                                                                               | -5.4867    |          |          |
| O <sup>2-</sup>                                                                                                | -0.0123    |          |          |
| Ga <sup>3+</sup>                                                                                               | -0.3167    |          |          |
| ZnCr <sub>2</sub> O <sub>4</sub>                                                                               | -424.4362  |          |          |
| Ga <sub>2</sub> O <sub>3</sub>                                                                                 | -184.7276  |          |          |
| Cr <sub>2</sub> O <sub>3</sub>                                                                                 | -84.3126   |          |          |
| ZnO                                                                                                            | -18.2438   |          |          |
| ZG                                                                                                             | -438.5273  |          |          |
| CG                                                                                                             | -334.6796  |          |          |
| ZGO                                                                                                            | -19.6894   |          |          |
| O <sub>2</sub>                                                                                                 | -9.8497    |          |          |
| ZnGa <sub>2</sub> O <sub>4</sub>                                                                               | -316.6387  |          |          |
| (1). 8Zn <sup>2+</sup> + 16Cr <sup>3+</sup> + 32O <sup>2-</sup> = ZnCr <sub>2</sub> O <sub>4</sub>             |            | 334.9394 |          |
| (2). 8Zn <sup>2+</sup> + 16Ga <sup>3+</sup> + 32O <sup>2-</sup> = ZnGa <sub>2</sub> O <sub>4</sub>             |            | 309.8619 |          |
| (3). 2Zn <sup>2+</sup> + 2O <sup>2-</sup> = ZnO                                                                |            | 17.8902  |          |
| (4). 4Cr <sup>3+</sup> + 6O <sup>2-</sup> = Cr <sub>2</sub> O <sub>3</sub>                                     |            | 62.2920  |          |
| (5). 12Ga <sup>3+</sup> + 18O <sup>2-</sup> = Ga <sub>2</sub> O <sub>3</sub>                                   |            | 180.7058 |          |
| (6). Zn <sup>2+</sup> + Ga <sup>3+</sup> + 2O <sup>2-</sup> = ZGO                                              |            | 19.1836  |          |
| (7). 7Zn <sup>2+</sup> + Ga <sup>3+</sup> + 16Cr <sup>3+</sup> + 32O <sup>2-</sup> = ZG                        |            | 348.8783 |          |
| (8). 8Zn <sup>2+</sup> + Ga <sup>3+</sup> + 17Cr <sup>3+</sup> + 32O <sup>2-</sup> = CG                        |            | 250.3528 |          |
| (9). ZnO + Ga <sub>2</sub> O <sub>3</sub> = ZnGa <sub>2</sub> O <sub>4</sub>                                   |            |          | 229.6797 |
| (10). 8 ZnO + Ga <sub>2</sub> O <sub>3</sub> + 6 ZnCr <sub>2</sub> O <sub>4</sub> + 29/2 O <sub>2</sub> = 14ZG |            |          | 192.4038 |
| (11). 14 ZnO + Ga <sub>2</sub> O <sub>3</sub> + 16 Cr <sub>2</sub> O <sub>3</sub> = 14 ZG + 9/2 O <sub>2</sub> |            |          | 243.7237 |
| (12). 16/15 ZnO + 1/15 Ga <sub>2</sub> O <sub>3</sub> + Cr <sub>2</sub> O <sub>3</sub> = 16/15 CG              |            |          | 162.7697 |
| (13). ZnO + 15 ZnCr <sub>2</sub> O <sub>4</sub> + Ga <sub>2</sub> O <sub>3</sub> = 16CG                        |            |          | -76.0651 |
| (14). 2 ZnO + Ga <sub>2</sub> O <sub>3</sub> = 4 Zn <sub>1/2</sub> Ga <sub>1/2</sub> O + 1/2 O <sub>2</sub>    |            |          | -75.0422 |
| (15). ZnO + Cr <sub>2</sub> O <sub>3</sub> = ZnCr <sub>2</sub> O <sub>4</sub>                                  |            |          | 254.7572 |

**Tables s3. Bader charge distribution of CO and Ga on ZnCr<sub>2</sub>O<sub>4</sub> (311), (310), (202) and (111) surfaces with and without Ga promotion.**

---

| surfaces  | Bader charge                              |
|-----------|-------------------------------------------|
| 311       |                                           |
| Ga-311    | 0.4092 <sup>a</sup>                       |
| CO/311    | 0.1929 <sup>b</sup>                       |
| CO/Ga-311 | -0.0112 <sup>b</sup> /0.7650 <sup>a</sup> |
| 310       | 0                                         |
| Ga-310    | 0.2940 <sup>a</sup>                       |
| CO on 310 | 0.0182 <sup>b</sup>                       |
| CO/Ga-310 | -0.1681 <sup>b</sup> /0.2000 <sup>a</sup> |
| 202       |                                           |
| Ga-202    | 0.7449 <sup>a</sup>                       |
| CO/202    | 0.0482 <sup>b</sup>                       |
| CO/Ga-202 | -0.0266 <sup>b</sup> /0.8388 <sup>a</sup> |

Note: a. bader charge on Ga; b. bader charge on CO.

**Table s4. The adsorption energy of CO on the exposed ZnCr<sub>2</sub>O<sub>4</sub> surfaces with or without Ga modification.**

| Surfaces | Adsorption energy of CO, eV |
|----------|-----------------------------|
| Ga- 202  | 0.03                        |
| 202      | -0.02                       |
| 311      | -0.78                       |
| Ga- 311  | -0.65                       |
| Ga- 310  | -0.80                       |
| 310      | -0.64                       |

**Table s5. XPS data for Cr2p spectras of K-Ga<sub>x</sub>ZnCr samples.**

| catalyst                  | concentration, mol% |       |                   |       |                  |       |
|---------------------------|---------------------|-------|-------------------|-------|------------------|-------|
|                           | Cr                  |       | Cr <sup>3+</sup>  |       | Cr <sup>6+</sup> |       |
|                           | Area                | mol,% | Area              | mol,% | Area             | mol,% |
| K-Ga <sub>0.0</sub> ZnCr  | 17168.58            | 10.23 | 63456.74+65357.93 | 76.77 | 21818.66         | 13.00 |
| K-Ga <sub>0.55</sub> ZnCr | 24759.53            | 12.27 | 65025.79+81071.56 | 72.43 | 30852.13         | 15.30 |
| K-Ga <sub>1.10</sub> ZnCr | 13991.78            | 7.22  | 61769.33+76872.51 | 71.56 | 41084.85         | 21.21 |
| K-Ga <sub>1.64</sub> ZnCr | 9970.29             | 5.32  | 91694.99+74899.72 | 88.97 | 10686.77         | 5.71  |
| K-Ga <sub>2.18</sub> ZnCr | 14936.69            | 7.09  | 93622.57+84781.25 | 84.66 | 17377.78         | 8.25  |

**Table s6. XPS data for Ga3d spectra of K-Ga<sub>x</sub>ZnCr catalysts.**

| catalyst                  | concentration, mol%          |       |                              |       |                              |       |                             |       |
|---------------------------|------------------------------|-------|------------------------------|-------|------------------------------|-------|-----------------------------|-------|
|                           | Ga <sup>3+</sup> at 17.06 eV |       | Ga <sup>3+</sup> at 19.93 eV |       | Ga <sup>3+</sup> at 21.62 eV |       | Ga <sup>3+</sup> at 23.74eV |       |
|                           | Area                         | mol,% | Area                         | mol,% | Area                         | mol,% | Area                        | mol,% |
| K-Ga <sub>0.55</sub> ZnCr | 1259.77                      | 17.93 | 2284.44                      | 32.52 | 2455.26                      | 34.95 | 1025.53                     | 14.60 |
| K-Ga <sub>1.10</sub> ZnCr | 974.87                       | 13.59 | 2309.46                      | 32.19 | 2955.38                      | 41.19 | 934.78                      | 13.03 |
| K-Ga <sub>1.64</sub> ZnCr | 1067.62                      | 15.09 | 1889.29                      | 26.70 | 2924.98                      | 41.34 | 1193.22                     | 16.87 |
| K-Ga <sub>2.18</sub> ZnCr | 1406.51                      | 18.41 | 1735.14                      | 22.71 | 3749.57                      | 49.08 | 748.80                      | 9.80  |

**Table s7. The surface concentration of oxygenates species of K-Ga<sub>x</sub>ZnCr catalysts.**

| atalyst                   | O <sub>latt</sub> /(O <sub>latt</sub> + O <sub>ads</sub> + O <sub>OH</sub> ) | O <sub>ads</sub> /(O <sub>latt</sub> + O <sub>ads</sub> + O <sub>OH</sub> ) | O <sub>OH</sub> /(O <sub>latt</sub> + O <sub>ads</sub> + O <sub>OH</sub> ) |
|---------------------------|------------------------------------------------------------------------------|-----------------------------------------------------------------------------|----------------------------------------------------------------------------|
| K-Ga <sub>0.0</sub> ZnCr  | 63.28                                                                        | 30.86                                                                       | 5.86                                                                       |
| K-Ga <sub>0.55</sub> ZnCr | 60.48                                                                        | 34.85                                                                       | 4.66                                                                       |
| K-Ga <sub>1.10</sub> ZnCr | 62.10                                                                        | 32.06                                                                       | 5.84                                                                       |
| K-Ga <sub>1.64</sub> ZnCr | 62.51                                                                        | 33.38                                                                       | 4.11                                                                       |
| K-Ga <sub>2.18</sub> ZnCr | 52.06                                                                        | 41.68                                                                       | 6.26                                                                       |

## Reference

1. D. A. Eustace, D. W. McComb and A. J. Craven, *Micron*, 2010, **41**, 547-553.
2. G. Kresse and J. Furthmuller, *Physical Review B*, 1996, **54**, 11169-11186.
3. G. Kresse and D. Joubert, *Physical Review B*, 1999, **59**, 1758-1775.
4. J. P. Perdew, K. Burke and M. Ernzerhof, *Physical Review Letters*, 1996, **77**, 3865-3868.
5. G. Henkelman, B. P. Uberuaga and H. Jonsson, *Journal of Chemical Physics*, 2000, **113**, 9901-9904.
6. Y. Li, F. Lian, N. Chen, Z.-j. Hao and K.-c. Chou, *International Journal of Minerals, Metallurgy, and Materials*, 2015, **22**, 524-529.
7. D. Zhou, J. Liu, S. Xu and P. Peng, *Computational Materials Science*, 2014, **86**, 24-29.
8. D. A. Andersson and C. R. Stanek, *Phys Chem Chem Phys*, 2013, **15**, 15550-15564.

**Table s8. The adsorption energy of H<sub>2</sub>, CO, H<sub>2</sub>O, CO<sub>2</sub> on ZnCr spinel and ZG surfaces.**

| catalyst                               | species and their adsorption energies |       |                  |                 |
|----------------------------------------|---------------------------------------|-------|------------------|-----------------|
|                                        | H <sub>2</sub>                        | CO    | H <sub>2</sub> O | CO <sub>2</sub> |
| ZnCr <sub>2</sub> O <sub>4</sub> (111) | -2.88                                 | -0.74 | 1.25             | -1.22           |
| ZG (111)                               | -1.06                                 | -2.99 | 1.73             | 0.42            |
| ZnGa <sub>2</sub> O <sub>4</sub> (111) |                                       | -0.36 | -1.83            | -1.31           |
